# Supplementary material
Source: publisher figshare collection journal article supplement (https://acs.figshare.com/ndownloader/files/5191573)

## Supplementary Material

**General.** All Reactions were carried out under an inert atmosphere. Dichloroethane, HMDS, benzene, DMSO and DMF were distilled from CaH<sub>2</sub> under atmospheric or reduced pressure. Et<sub>3</sub>N was distilled from KOH under atmospheric pressure. Triethylsilane was distilled and passed through Al<sub>2</sub>O<sub>3</sub> before using. Unless otherwise described, other materials were obtained from commercial suppliers and used without further purification. Organic extracts were dried over MgSO<sub>4</sub> or Na<sub>2</sub>SO<sub>4</sub>, filtered and concentrated under reduced pressure using an evaporator. All melting points are uncorrected. The <sup>1</sup>H and <sup>13</sup>C NMR spectra were reported in ppm downfield from TMS ( $\delta$  = 0) for the <sup>1</sup>H NMR and relative to the central CDCl<sub>3</sub> resonance ( $\delta$  = 77.00) for the <sup>13</sup>C NMR.

### Preparation of **1** (Scheme S-1)

Scheme S-1.

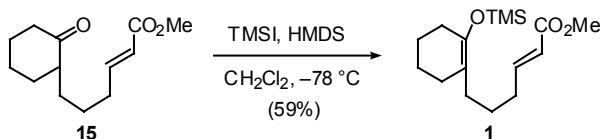

**Methyl (2E)-6-(2-Trimethylsilyloxy-1-cyclohexenyl)-2-hexenoate (**1**).** To a solution of **15** (512 mg, 2.28 mmol) and HMDS (1.15 mL, 5.45 mmol) in CH<sub>2</sub>Cl<sub>2</sub> (6.0 mL) was added TMSI (0.39 mL, 2.74 mmol) at  $-78^\circ\text{C}$ . After 5 minutes, to the reaction mixture was added to Et<sub>2</sub>O and one portion of brine. The organic layer was washed with brine, dried and concentrated. The residue was purified by column chromatography on silica gel with 20% AcOEt/hexane to give **1** (400 mg, 59%) as colorless oil. IR (neat)  $\nu$  2930, 2858, 2838, 1727, 1679, 1658, 1436, 1269, 1252, 1171, 929, 844; <sup>1</sup>H NMR (300 MHz, CDCl<sub>3</sub>) 7.12 (dt, 1H,  $J$  = 15.7, 6.9 Hz), 5.83 (dt, 1H,

$J = 15.7, 1.5$  Hz), 3.72 (s, 3H), 2.18 (dddd, 2H,  $J = 6.9, 6.9, 6.9, 1.5$  Hz), 2.07–2.00 (m, 4H), 1.94 (t, 2H,  $J = 5.9$  Hz), 1.69–1.40 (m, 6H), 0.16 (s, 9H);  $^{13}\text{C}$  NMR (75 MHz,  $\text{CDCl}_3$ )  $\delta$  167.3, 150.0, 143.7, 120.8, 114.9, 51.2, 32.0, 30.2, 29.5, 27.5, 25.9, 23.5, 22.9, 0.59; LRMS (EI)  $m/z$  296 ( $\text{M}^+$ ). HRMS  $m/z$  calcd. for  $\text{C}_{16}\text{H}_{28}\text{O}_3\text{Si}$ , 296.1806; found 296.1822.

**(1*S*\*,2*R*\*,3*R*\*,7*S*\*)-1-Hydroxy-2-methoxycarbonyltricyclo[5.4.0.0<sup>3,7</sup>]undecane (2b).**

Colorless oil: IR (neat,  $\text{cm}^{-1}$ ) 3436 (br), 2931, 2856, 1730, 1714, 1436, 1272, 1215;  $^1\text{H}$  NMR (300 MHz,  $\text{CDCl}_3$ )  $\delta$  3.69 (s, 3H), 2.62 (d, 1H,  $J = 7.8$  Hz), 2.44 (dd, 1H,  $J = 7.8, 5.5$  Hz), 2.29–2.20 (m, 1H), 1.89–1.44 (m, 10H), 1.42–1.20 (m, 4H); LRMS (EI)  $m/z$  224 ( $\text{M}^+$ ). HRMS  $m/z$  calcd. for  $\text{C}_{13}\text{H}_{20}\text{O}_3$ , 224.1412; found 224.1409.

**(1*R*\*,6*S*\*,8*R*\*)-1-(*tert*-Butyldimethylsiloxy)-8-**

**(pentafluorophenoxycarbonyl)bicyclo[4.2.0]octane (*trans*-6d).** Colorless oil; IR (neat,  $\text{cm}^{-1}$ ) 2931, 1779, 1520, 1465, 1293, 1252, 1191, 1104, 1075, 1006, 836, 775;  $^1\text{H}$  NMR (300 MHz,  $\text{CDCl}_3$ )  $\delta$  3.24 (dd, 1 H,  $J = 10.2, 8.2$  Hz), 2.41 (m, 1H), 1.96–1.42 (m, 8H), 1.40–1.22 (m, 2H), 0.89 (s, 9H), 0.17 (s, 3H), 0.16 (s, 3H);  $^{13}\text{C}$  NMR (75 MHz,  $\text{CDCl}_3$ )  $\delta$  168.2, 76.8, 49.5, 41.2, 31.8, 25.5, 23.4, 21.1, 20.3, 18.6, 17.8, –2.96; LRMS (EI)  $m/z$  435 ( $\text{M}^+ - 15$ ); *Anal* calcd for  $\text{C}_{21}\text{H}_{27}\text{F}_5\text{O}_3\text{Si}$ : C, 55.99; H, 6.04, found C, 56.30; H, 6.05.

**(1*R*\*,6*S*\*,8*R*\*)-1-(*tert*-Butyldimethylsiloxy)-8-**

**(pentachlorophenoxycarbonyl)bicyclo[4.2.0]octane (*trans*-6e).** Colorless oil; IR (neat,  $\text{cm}^{-1}$ ) 2928, 1773, 1520, 1361, 1104, 1075, 1005, 834, 774, 668;  $^1\text{H}$  NMR (300 MHz,  $\text{CDCl}_3$ )  $\delta$  3.24 (dd, 1 H,  $J = 10.2, 8.2$  Hz), 2.38 (m, 1H), 1.97–1.72 (m, 3H), 1.65–1.20 (m, 7H), 0.88 (s, 9H),

0.18 (s, 3H), 0.16 (s, 3H); LRMS (EI)  $m/z$  475 ( $M^+ - 57$ ); *Anal* calcd for  $C_{21}H_{27}Cl_5O_3Si$ : C, 47.34; H, 5.11, found C, 47.05; H, 5.21.

**(1*R*<sup>\*</sup>,6*S*<sup>\*</sup>,8*R*<sup>\*</sup>)-1-(*tert*-Butyldimethylsiloxy)-8-(1,1,1,3,3,3-hexafluoroisopropoxycarbonyl)bicyclo[4.2.0]octane (6f).** Colorless oil: IR (neat,  $cm^{-1}$ ) 2932, 2860, 1771, 1465, 1386, 1360, 1291, 1233, 1202, 1111, 837, 775, 690;  $^1H$  NMR (300 MHz,  $CDCl_3$ )  $\delta$  5.77 (m, 1H), 3.06 (dd, 1H,  $J = 10.2, 8.2$  Hz), 2.37 (m, 1H), 1.89–1.42 (m, 8H), 1.36–1.20 (m, 2H), 0.88 (s, 9H), 0.16 (s, 3H), 0.13 (s, 3H);  $^{13}C$  NMR (75 MHz,  $CDCl_3$ )  $\delta$  169.1, 120.6 (q,  $J = 278$  Hz), 76.7, 66.1, 49.3, 41.0, 31.8, 25.3, 21.1, 20.2, 18.5, 17.8, –3.0, –3.1; LRMS (EI)  $m/z$  377 ( $M^+ - 57$ ); *Anal* calcd for  $C_{18}H_{28}F_6O_3Si$ : C, 49.76; H, 6.50, found C, 49.65; H, 6.40.

**(1*R*<sup>\*</sup>,6*S*<sup>\*</sup>,8*S*<sup>\*</sup>)-1-Hydroxy-8-hydroxymethylbicyclo[4.2.0]octane (*trans*-7).** To a solution of *trans*-6a (100 mg, 0.335 mmol) in  $CH_2Cl_2$  (3.4 mL) at –78 °C was added 1M DIBALH-hexane (0.74 mL, 0.740 mmol), and the mixture was stirred for 90 min at –78 °C. After addition of MeOH (0.5 mL) and  $Et_2O$  (3.0 mL), the mixture was stirred for 1.5 h at ambient temperature, filtered through Celite and evaporated.

A solution of the crude alcohol in 1M TBAF-THF (0.7 mL, 0.70 mmol) was refluxed for 18 h. The resulting mixture was diluted with AcOEt, washed with  $H_2O$  and brine, dried and concentrated. The residue was purified by column chromatography on silica gel with AcOEt to give *trans*-7 (24 mg, 46% for 2 steps) as colorless crystals; mp 92–94 °C; IR (KBr,  $cm^{-1}$ ) 3332 (br.), 3266, 2940, 2910, 1458, 1237, 1031, 611;  $^1H$  NMR (300 MHz,  $CDCl_3$ )  $\delta$  3.74–3.55 (m, 2H), 2.93 (br. s, 1H), 2.56 (br. s, 1H), 2.32–1.90 (m, 2H), 1.80–1.18 (m, 9H), 1.01 (q, 1H,  $J = 10.4$  Hz);  $^{13}C$  NMR (75 MHz,  $CDCl_3$ )  $\delta$  73.5, 62.1, 48.7, 40.0, 29.4, 23.4, 21.5, 20.1, 19.3;

LRMS (EI)  $m/z$  138 ( $M^+ - 18$ ). *Anal* calcd for  $C_9H_{16}O_2$ : C, 69.19; H, 10.32, found C, 69.00; H, 9.99.

**(1*R*\*,6*S*\*,8*R*\*)-1-Hydroxy-8-hydroxymethylbicyclo[4.2.0]octane (*cis*-7).** *Cis*-7 was prepared from *cis*-6a by same method as that of preparation of *trans*-7 (79% for 2 steps); Colorless oil; IR (neat,  $cm^{-1}$ ) 3348 (br.), 2929, 2855, 1437, 1285, 1178, 1036, 668;  $^1H$  NMR (300 MHz,  $CDCl_3$ )  $\delta$  3.98 (dd, 1H,  $J = 11.2, 9.2$  Hz), 3.74 (dd, 1H,  $J = 11.2, 4.7$  Hz), 2.86 (br s, 2H), 2.47 (m, 1H), 2.24 (m, 1H), 1.88–1.22 (m, 10H);  $^{13}C$  NMR (75 MHz,  $CDCl_3$ )  $\delta$  73.4, 63.4, 45.3, 40.1, 31.2, 24.4, 21.2, 20.7, 19.2; LRMS (EI)  $m/z$  156 ( $M^+$ ). HRMS calcd for  $C_9H_{16}O_2$ , 156.1150; found 156.1194.

**(1*R*\*,6*R*\*,8*S*\*)-3,3-Dimethyl-2,4-dioxotricyclo[6.4.0.0<sup>1,6</sup>]undecane (8).** To a solution of *cis*-7 (11 mg, 70  $\mu$ mol) and a small amount of TsOH in DMF (0.6 mL) was added 2,2-dimethoxybutane (0.08 mL, 650  $\mu$ mol) and the mixture was stirred for 8 h at 80 °C. The mixture was cooled to room temperature and quenched with saturated aqueous  $NaHCO_3$  (a few drops), then  $H_2O$  was added. Aqueous layer was extracted with  $Et_2O$  and the combined organic layer was dried over  $Na_2SO_4$  and evaporated. The residue was purified by column chromatography on silica gel with 10%  $Et_2O$ /hexane to afford **8** (9.4 mg, 68%) as pale yellow oil; IR (neat,  $cm^{-1}$ ) 2934, 2856, 1449, 1378, 1367, 1241, 1191, 1120, 966, 845;  $^1H$  NMR (300 MHz,  $CDCl_3$ )  $\delta$  4.00 (dd, 1H,  $J = 12.4, 3.8$  Hz), 3.58 (dd, 1H,  $J = 12.4, 2.2$  Hz), 2.41–2.26 (m, 2H), 2.18–2.06 (m, 1H), 2.02–1.88 (m, 2H), 1.69–1.11 (m, 7H), 1.43 (s, 3H), 1.41 (s, 3H);  $^{13}C$  NMR (75 MHz,  $CDCl_3$ )  $\delta$  96.6, 76.5, 59.9, 39.0, 35.3, 32.3, 30.1, 29.6, 26.0, 24.0, 22.6, 22.4; LRMS (EI)  $m/z$  196 ( $M^+$ ). HRMS calcd for  $C_{12}H_{20}O_2$ , 196.1463; found 196.1502.

**(1*R*<sup>\*</sup>,6*S*<sup>\*</sup>,8*S*<sup>\*</sup>)-1-(Triethylsiloxy)-8-(1,1,1,3,3,3-**

**hexafluoroisopropoxycarbonyl)bicyclo[4.2.0]octane (6h).** Colorless oil (dr 89 : 11); <sup>1</sup>H NMR (300 MHz, CDCl<sub>3</sub>) δ 5.78 (m, 1H), 3.31 (dd, 0.1H, *J* = 7.6, 7.6 Hz), 3.06 (dd, 0.9H, *J* = 10.2, 8.2 Hz), 2.48 (m, 0.1H), 2.36 (m, 0.9H), 2.04–1.42 (m, 8H), 1.38–1.15 (m, 2H), 0.97 (t, 8.1H, *J* = 7.7 Hz), 0.93 (t, 0.9H, *J* = 7.8 Hz), 0.63 (q, 5.4H, *J* = 7.7 Hz), 0.61 (q, 0.6H, 7.8 Hz); LRMS (EI) *m/z* 405 (*M*<sup>+</sup>–27). HRMS calcd for C<sub>16</sub>H<sub>25</sub>O<sub>3</sub>F<sub>6</sub>Si, 405.1321; found 405.1327.

**(1*R*<sup>\*</sup>,6*S*<sup>\*</sup>,8*S*<sup>\*</sup>)-1-(Triisopropylsiloxy)-8-(1,1,1,3,3,3-**

**hexafluoroisopropoxycarbonyl)bicyclo[4.2.0]octane (6i).** Colorless oil: IR (neat, cm<sup>–1</sup>) 2944, 2868, 1771, 1464, 1386, 1291, 1202, 1111, 882, 690; <sup>1</sup>H NMR (300 MHz, CDCl<sub>3</sub>) δ 5.79 (m, 1H), 3.11 (dd, 1H, *J* = 10.2, 8.2 Hz), 2.40 (m, 1H), 1.91–1.24 (m, 13H), 1.08 (s, 18H); <sup>13</sup>C NMR (75 MHz, CDCl<sub>3</sub>) δ 169.3, 120.5 (q, *J* = 278 Hz), 76.4, 66.2 (quint, *J* = 32 Hz), 49.9, 41.5, 32.4, 23.3, 21.1, 20.4, 18.3, 18.0, 13.0; LRMS (EI) *m/z* 433 (*M*<sup>+</sup>–43). HRMS calcd for C<sub>18</sub>H<sub>27</sub>F<sub>6</sub>O<sub>3</sub>Si, 433.1634; found 433.1635.

**(1*R*<sup>\*</sup>,6*S*<sup>\*</sup>,8*S*<sup>\*</sup>)-8-(1,1,1,3,3,3-Hexafluoroisopropoxycarbonyl)**

**-1-**

**methoxybicyclo[4.2.0]octane (6j).** Colorless oil: IR (neat, cm<sup>–1</sup>) 2937, 1769, 1457, 1387, 1360, 1289, 1231, 1202, 1110, 907, 690; <sup>1</sup>H NMR (300 MHz, CDCl<sub>3</sub>) δ 5.77 (m, 1H), 3.31 (s, 3H), 3.16 (dd, 1H, *J* = 10.4, 8.2 Hz), 2.43 (m, 1H), 1.98–1.74 (m, 3H), 1.66–1.14 (m, 7H); LRMS (EI) *m/z* 334 (*M*<sup>+</sup>). HRMS calcd for C<sub>13</sub>H<sub>16</sub>F<sub>6</sub>O<sub>3</sub>, 334.1004; found 334.1003.

**(1*R*<sup>\*</sup>,5*S*<sup>\*</sup>,7*R*<sup>\*</sup>)- and (1*R*<sup>\*</sup>,5*S*<sup>\*</sup>,7*S*<sup>\*</sup>)-1-(*tert*-Butyldimethylsiloxy)-7-(1,1,1,3,3,3-hexafluoroisopropoxycarbonyl)bicyclo[4.2.0]heptane (10a).** Colorless oil (dr 60 : 40); <sup>1</sup>H NMR (300 MHz, CDCl<sub>3</sub>) δ 5.84–5.68 (m, 1H), 3.39 (dd, 0.6H, *J* = 9.9, 9.9 Hz), 3.14 (dd, 0.4H, *J* = 8.8, 6.3 Hz), 2.67–2.54 (m, 1H), 2.18 (dt, 0.6H, *J* = 12.6, 9.9 Hz), 1.98–1.28 (m, 7.4H), 0.87 (s, 5.4H), 0.84 (s, 3.6H), 0.12 (s, 1.8H), 0.10 (s, 1.8H), 0.09 (s, 1.2H), 0.03 (s, 1.2H); LRMS (EI) *m/z* 405 (*M*<sup>+</sup>–15). HRMS calcd for C<sub>16</sub>H<sub>23</sub>F<sub>6</sub>O<sub>3</sub>Si, 405.1319; found 405.1324.

**(1*R*<sup>\*</sup>,7*S*<sup>\*</sup>,9*R*<sup>\*</sup>)-1-(*tert*-Butyldimethylsiloxy)-9-(1,1,1,3,3,3-hexafluoroisopropoxycarbonyl)bicyclo[5.2.0]nonane (10b).** Colorless oil: IR (neat, cm<sup>–1</sup>) 2930, 2857, 1771, 1463, 1386, 1289, 1203, 1111, 837, 775, 690; <sup>1</sup>H NMR (300 MHz, CDCl<sub>3</sub>) δ 5.78 (m, 1H), 3.25 (t, 1H, *J* = 9.6 Hz), 2.40 (m, 1H), 2.14 (dt, 1H, *J* = 11.8, 9.3 Hz), 1.96 (m, 1H), 1.87–1.50 (m, 6H), 1.29–1.10 (m, 4H), 0.91 (s, 9H), 0.19 (s, 3H), 0.15 (s, 3H); <sup>13</sup>C NMR (75 MHz, CDCl<sub>3</sub>) δ 169.3, 120.6 (q, *J* = 278 Hz), 82.7, 66.3 (quint, *J* = 32 Hz), 47.9, 47.3, 34.4, 33.0, 31.9, 26.5, 25.6, 23.6, 21.8, 18.0, –3.1, –3.3; LRMS (EI) *m/z* 391 (*M*<sup>+</sup>–57). *Anal* calcd for C<sub>19</sub>H<sub>30</sub>F<sub>6</sub>O<sub>3</sub>Si: C, 50.88; H, 6.74, found C, 50.52; H, 6.65.

**(1*R*<sup>\*</sup>,8*S*<sup>\*</sup>,10*R*<sup>\*</sup>)-1-(*tert*-Butyldimethylsiloxy)-10-(1,1,1,3,3,3-hexafluoroisopropoxycarbonyl)bicyclo[6.2.0]decane (10c).** Colorless solids: mp 40–41 °C; IR (neat, cm<sup>–1</sup>) 2932, 2857, 1772, 1387, 1356, 1289, 1232, 1032, 1023, 1111, 923, 834, 775, 668; <sup>1</sup>H NMR (300 MHz, CDCl<sub>3</sub>) δ 5.78 (m, 1H), 3.35 (dd, 1H, *J* = 10.4, 10.4 Hz), 2.13 (m, 1H), 2.03 (m, 1H), 1.80–1.27 (m, 12H), 1.08 (m, 1H), 0.90 (s, 9H), 0.19 (s, 3H), 0.16 (s, 3H); <sup>13</sup>C NMR (75 MHz, CDCl<sub>3</sub>) δ 169.2, 120.6 (q, *J* = 278 Hz), 82.2, 66.3 (quint, *J* = 32 Hz), 48.9,

47.1, 31.3, 28.8, 26.7, 25.7, 24.6, 24.1, 20.8, 18.2, -2.6, -3.1; LRMS (EI)  $m/z$  405 ( $M^+ - 57$ ).

HRMS calcd for  $C_{20}H_{32}F_6O_3Si$ , 405.1321; found 405.1308.

**(1*R*\*,6*S*\*,8*S*\*)-1-(*tert*-Butyldimethylsiloxy)-8-methoxycarbonyl-6-**

**methylbicyclo[4.2.0]octane (10d).** Colorless oil; IR (neat,  $cm^{-1}$ ) 2960, 2858, 1732, 1464, 1292, 1223, 1178, 1097, 837, 775;  $^1H$  NMR (400 MHz,  $CDCl_3$ )  $\delta$  3.68 (s, 3H), 3.16 (t, 1H,  $J = 8.8$  Hz), 1.83 (t, 1H,  $J = 10.4$  Hz), 1.67 (m, 2H), 1.57–1.14 (m, 7H), 1.08 (s, 3H), 0.89 (s, 9H), 0.15 (s, 3H), 0.10 (s, 3H);  $^{13}C$  NMR (75 MHz,  $CDCl_3$ )  $\delta$  173.7, 50.9, 48.3, 41.1, 33.1, 32.0, 26.6, 25.9, 25.7, 24.6, 21.4, 20.0, 18.3, -3.2, -3.5; LRMS (EI)  $m/z$  255 ( $M^+ - 57$ ). *Anal* calcd for  $C_{17}H_{32}O_3Si$ : C, 65.33; H, 10.32, found C, 65.38; H, 10.11.

**(1*R*\*,6*S*\*,8*S*\*) -1-(*tert*-Butyldimethylsiloxy)-8-(1,1,1,3,3,3-hexafluoroisopropoxycarbonyl) –**

**6-methylbicyclo[4.2.0]octane (10d').** Colorless oil; IR (neat,  $cm^{-1}$ ) 2931, 2860, 1771, 1468, 1387, 1360, 1290, 1227, 1105, 907, 837, 777, 689;  $^1H$  NMR (400 MHz,  $CDCl_3$ )  $\delta$   $\square\square$ septet, 1H,  $J = 6.1$  Hz), 3.30 (t, 1H,  $J = 8.0$  Hz), 1.88 (t, 1H,  $J = 10.7$  Hz), 1.80 (m, 1H), 1.66–1.18 (m, 8H), 1.11 (s, 3H), 0.88 (s, 9H), 0.13 (s, 3H), 0.11 (s, 3H);  $^{13}C$  NMR (75 MHz,  $CDCl_3$ )  $\delta$  170.2, 120.6 (q,  $J = 278$  Hz), 77.9, 66.2 (quint,  $J = 32$  Hz), 48.2, 41.7, 33.0, 31.9, 26.7, 25.6, 24.5, 21.3, 20.0, 18.3, -3.3, -3.6; LRMS (EI)  $m/z$  391 ( $M^+ - 57$ ). HRMS calcd for  $C_{15}H_{21}F_6O_3Si$ , 391.1164; found 391.1164.

**(1*R*\*,2*R*\*)-1-(*tert*-Butyldimethylsiloxy)-1-phenyl-2-(1,1,1,3,3,3-**

**hexafluoroisopropoxycarbonyl)cyclobutane (*trans*-10e).** Colorless oil; IR (neat,  $cm^{-1}$ ) 2960, 2932, 2860, 1774, 1771, 1473, 1386, 1289, 1233, 1200, 1111, 831, 777, 700, 690;  $^1H$  NMR

(300 MHz, CDCl<sub>3</sub>)  $\delta$  7.46–7.40 (m, 2H), 7.34–7.21 (m, 3H), 5.41 (m, 1H), 3.67 (t, 1H,  $J$  = 9.2 Hz), 2.83 (dddd, 1H,  $J$  = 11.9, 8.2, 3.8, 0.8 Hz), 2.44 (dt, 1H,  $J$  = 11.9, 9.7 Hz), 2.23–2.04 (m, 2H), 0.93 (s, 9H), 0.047 (s, 6H); <sup>13</sup>C NMR (75 MHz, CDCl<sub>3</sub>)  $\delta$  168.2, 141.3, 128.2, 127.9, 125.8, 80.9, 66.2 (quint,  $J$  = 32 Hz), 53.9, 33.9, 25.6, 17.9, 15.6, -3.1, -3.3; LRMS (EI)  $m/z$  456 ( $M^+$ ). HRMS calcd for C<sub>20</sub>H<sub>26</sub>F<sub>6</sub>O<sub>3</sub>Si, 456.1555; found 456.1518.

**Estrone analogue (10g).** Colorless solids (dr 58 : 42); <sup>1</sup>H NMR (300 MHz, CDCl<sub>3</sub>) 7.24 (d, 0.4H,  $J$  = 8.7 Hz), 7.18 (d, 0.6H,  $J$  = 8.5 Hz), 6.73 (dd, 0.4H,  $J$  = 9.2, 2.6 Hz), 6.70 (dd, 0.6H,  $J$  = 8.9, 2.6 Hz), 6.65 (m, 0.4H), 6.63 (m, 0.6H), 5.76 (m, 0.6H), 5.63 (m, 0.4H), 3.78 (s, 1.2H), 3.77 (s, 1.8H), 3.54 (dd, 0.4H,  $J$  = 8.8, 8.8 Hz), 3.46 (dd, 0.6H,  $J$  = 11.4, 8.9 Hz), 2.96–2.60 (m, 3H), 2.46–2.10 (m, 2H), 2.04–1.86 (m, 1H), 1.80–1.20 (m, 13H), 0.92 (s, 5.4H), 0.84 (s, 3.6H), 0.32 (s, 1.2H), 0.26 (s, 1.8H), 0.16 (s, 1.8H), 0.12 (s, 1.2H); LRMS (EI)  $m/z$  620 ( $M^+$ ). *Anal* calcd for C<sub>31</sub>H<sub>42</sub>F<sub>6</sub>O<sub>4</sub>Si: C, 58.98; H, 6.82, found C, 58.92; H, 6.78.

**(1*R*<sup>\*</sup>,6*S*<sup>\*</sup>,7*S*<sup>\*</sup>,8*R*<sup>\*</sup>)-1-(*tert*-Butyldimethylsiloxy)-7-methyl-8-**

**(pentafluorophenoxycarbonyl)bicyclo[4.2.0]octane (10h).** Colorless oil: IR (neat, cm<sup>-1</sup>) 2931, 2859, 1776, 1520, 1290, 1244, 1195, 1079, 1004, 836, 775; <sup>1</sup>H NMR (300 MHz, CDCl<sub>3</sub>)  $\delta$  2.81 (d, 1H,  $J$  = 10.3 Hz), 2.04 (m, 1H), 1.94 (dd, 1H,  $J$  = 10.4, 3.3 Hz), 1.84 (br d, 1H,  $J$  = 14.6 Hz), 1.71–1.46 (m, 5H), 1.39–1.20 (m, 2H), 1.17 (d, 3H,  $J$  = 6.0 Hz), 0.89 (s, 9H), 0.16 (s, 3H), 0.15 (s, 3H); <sup>13</sup>C NMR (75 MHz, CDCl<sub>3</sub>)  $\delta$  168.0, 74.3, 57.0, 49.0, 32.7, 27.5, 25.5, 22.1, 21.6, 10.6, 18.9, 17.8, -3.0; LRMS (EI)  $m/z$  407 ( $M^+$ -57). HRMS calcd for C<sub>19</sub>H<sub>20</sub>F<sub>5</sub>O<sub>3</sub>Si, 407.1102; found 407.1107.



**(1*R*<sup>\*</sup>,6*S*<sup>\*</sup>,8*R*<sup>\*</sup>)-1-(*tert*-Butyldimethylsiloxy)-8-methyl-8-**

**(hexafluoroisopropoxycarbonyl)bicyclo[4.2.0]octane (10i).** Colorless oil: IR (neat, cm<sup>-1</sup>) 2934, 2859, 1790, 1465, 1387, 1355, 1292, 1223, 1200, 1111, 1096, 836, 774, 689; <sup>1</sup>H NMR (300 MHz, CDCl<sub>3</sub>) δ 5.74 (m, 1H), 2.44 (m, 1H), 1.92 (dd, 1H, *J* = 12.3, 12.3 Hz), 1.83 (d, 1H, *J* = 12.3 Hz), 1.67–1.16 (m, 8H), 1.41 (s, 3H), 0.90 (s, 9H), 0.141 (s, 3H), 0.135 (s, 3H); <sup>13</sup>C NMR (75 MHz, CDCl<sub>3</sub>) δ 172.9, 120.6 (q, *J* = 278 Hz), 75.8, 66.1 (quint, *J* = 32 Hz), 52.1, 38.0, 33.6, 25.6, 25.4, 23.3, 21.0, 18.73, 18.65, 18.3, –2.8; LRMS (EI) *m/z* 391 (M<sup>+</sup>–57). HRMS calcd for C<sub>15</sub>H<sub>21</sub>F<sub>6</sub>O<sub>3</sub>Si, 391.1164; found 391.1154.

## Preparation of (*E*)- and (*Z*)-11 (Scheme S-2)

Scheme S-2.

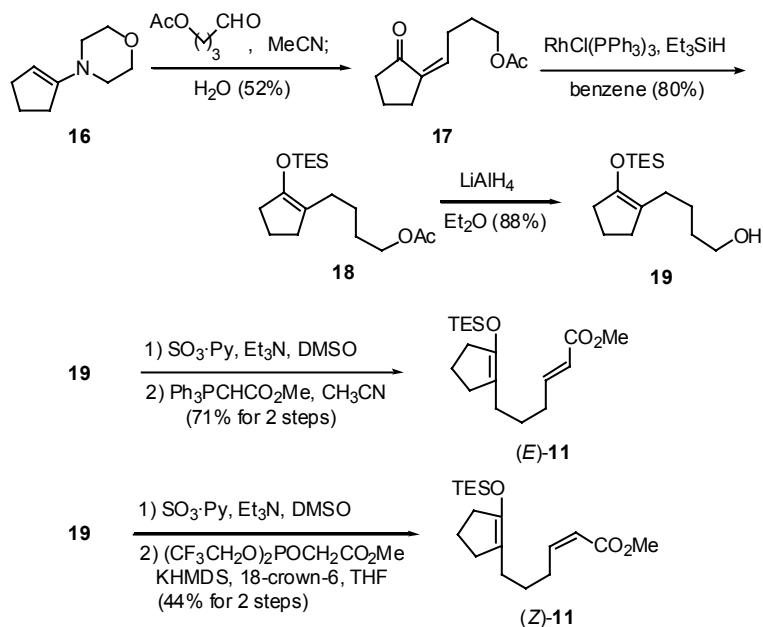

**2-(4-Acetoxybutyl)cyclopentan-1-one (17).** The solution of 4-(1-cyclopenten-1-yl)morpholine **16** (650 mg, 4.25 mmol) and 4-acetoxybutanal (580 mg, 4.25 mmol) in MeCN (8.5 mL) was refluxed for 17 h. After addition of H<sub>2</sub>O (1.0 mL), the resulting mixture was further refluxed for 1 h. After dilution with Et<sub>2</sub>O, organic layer was washed with saturated aqueous NH<sub>4</sub>Cl, saturated aqueous NaHCO<sub>3</sub> and brine, dried and concentrated. The residue was purified by column chromatography on silica gel with 20% AcOEt/hexane to afford **17** (464 mg, 52%) as colorless oil: IR (neat, cm<sup>-1</sup>) 2960, 1740, 1719, 1650, 1367, 1239, 1182, 1043, 824; <sup>1</sup>H NMR (300 MHz, CDCl<sub>3</sub>) δ 6.52 (tt, 1 H, *J* = 7.7, 2.7 Hz), 4.08 (t, 2H, *J* = 7.0 Hz), 2.58 (m, 2H), 2.34 (t, 2H, *J* = 7.7 Hz), 2.24 (q, 2H, *J* = 7.0 Hz), 2.05 (s, 3H), 1.94 (quint, 2H, *J* = 7.7 Hz), 1.81 (quint, 2H, *J* = 7.0 Hz); <sup>13</sup>C NMR (75 MHz, CDCl<sub>3</sub>) δ 207.1, 171.1, 138.0, 134.3, 63.5, 38.3, 27.2, 26.5, 26.0, 20.7, 19.5; LRMS (EI) *m/z* 197 (M<sup>+</sup>+1). HRMS *m/z* calcd. for C<sub>11</sub>H<sub>17</sub>O<sub>3</sub>, 197.1177; found 197.1206.

**2-(4-Acetoxybutyl)-1-triethylsiloxy-1-cyclopentene (18).** To a solution of **17** (1.94 g, 9.89 mmol) in benzene (10 mL) was added Et<sub>3</sub>SiH (1.74 mL, 10.9 mmol) at 0 °C and stirred for 1 h. After addition of RhCl(PPh<sub>3</sub>)<sub>3</sub> (9 mg, 0.1 mol%), the resulting mixture was stirred at 50 °C for 6 h and concentrated. The residue was purified by column chromatography on silica gel with 20% AcOEt/hexane to afford **18** (2.47 g, 80%) as colorless oil: IR (neat, cm<sup>-1</sup>) 2954, 1742, 1683, 1365, 1241, 1017, 859, 730; <sup>1</sup>H NMR (300 MHz, CDCl<sub>3</sub>) δ 4.06 (t, 2 H, *J* = 6.6 Hz), 2.30 (br t, 2H, *J* = 7.3 Hz), 2.18 (br t, 2H, *J* = 7.3 Hz), 2.05 (br t, 2H, *J* = 7.3 Hz), 2.04 (s, 3H), 1.79 (quint, 2H, *J* = 7.3 Hz), 1.61 (quint, 2H, *J* = 7.3 Hz), 1.41 (quint, 2H, *J* = 7.3 Hz), 0.98 (t, 9H, *J* = 7.8 Hz), 0.64 (q, 6H, *J* = 7.8 Hz); <sup>13</sup>C NMR (75 MHz, CDCl<sub>3</sub>) δ 171.3, 147.0, 115.9, 64.5, 33.6, 30.7, 28.4, 25.6, 23.8, 20.8, 19.7, 6.46, 5.25; LRMS (EI) *m/z* 312 (M<sup>+</sup>). HRMS *m/z* calcd. for C<sub>17</sub>H<sub>32</sub>O<sub>3</sub>Si, 312.2121; found 312.2143.

**2-(4-Hydroxybutyl)-1-triethylsiloxy-1-cyclopentene (19).** After refluxing the solution of LiAlH<sub>4</sub> (0.45 g, 11.9 mmol) in Et<sub>2</sub>O (70 mL), a solution of **18** (2.45 g, 7.84 mmol) in Et<sub>2</sub>O (70 mL) was added slowly with gentle reflux without heating, and resulting mixture was heated under reflux for 30 min. After the reaction was over, H<sub>2</sub>O (0.5 mL), 15% NaOH (0.5 mL) and H<sub>2</sub>O (0.8 mL) were added slowly at 0 °C. The mixture was dried and concentrated. The residue was purified by column chromatography on silica gel with 20% AcOEt/hexane to afford **19** (1.86 g, 88%) as colorless oil: IR (neat, cm<sup>-1</sup>) 3385 (br.), 2936, 2876, 1683, 1556, 1348, 1304, 1210, 1017, 859, 730; <sup>1</sup>H NMR (300 MHz, CDCl<sub>3</sub>) δ 3.64 (t, 2H, *J* = 6.4 Hz), 2.29 (br t, 2H, *J* = 7.3 Hz), 2.18 (br t, 2H, *J* = 7.3 Hz), 2.05 (t, 2H, *J* = 7.4 Hz), 1.78 (quint, 2H, *J* = 7.3 Hz), 1.54 (quint, 2H, *J* = 7.0 Hz), 1.41 (quint, 2H, *J* = 7.0 Hz), 0.97 (t, 9H, *J* = 7.8 Hz), 0.64 (q, 6H, *J* =

7.8 Hz);  $^{13}\text{C}$  NMR (75 MHz,  $\text{CDCl}_3$ )  $\delta$  146.8, 116.3, 62.9, 33.7, 32.5, 30.7, 25.7, 23.7, 19.7, 6.5, 5.3; LRMS (EI)  $m/z$  270 ( $\text{M}^+$ ). HRMS  $m/z$  calcd. for  $\text{C}_{15}\text{H}_{30}\text{O}_2\text{Si}$ , 270.2013; found 270.2014.

**Methyl (2*E*)-6-(2-Triethylsilyloxy-1-cyclopentenyl)-2-hexenoate ((*E*)-11).** To the mixture of **19** (1.86 g, 6.88 mmol) in DMSO (14 mL) was added  $\text{Et}_3\text{N}$  (5.8 mL, 41.6 mmol) and the mixture was stirred for 1 h. To the mixture,  $\text{SO}_3\cdot\text{Py}$  (3.3 g, 20.7 mmol) was added and stirred for 30 min. The resulting mixture was quenched with  $\text{H}_2\text{O}$  and extracted 3 times with  $\text{Et}_2\text{O}$ . Combined organic layer was washed with saturated aqueous  $\text{NH}_4\text{Cl}$ , saturated aqueous  $\text{NaHCO}_3$  and brine, dried and concentrated to afford crude aldehyde, which was used in the next reaction without further purification.

A mixture of the above aldehyde and methyl (triphenylphosphoranylidene)acetate (2.8 g, 8.37 mmol) in MeCN (30 mL) was stirred for 16 h at rt, and concentrated. The residue was purified by column chromatography on silica gel with 5%  $\text{Et}_2\text{O}$ /hexane to afford (*E*)-**11** (1.59 g, 71% for 2 steps) as colorless oil: IR (neat,  $\text{cm}^{-1}$ ) 2953, 1728, 1682, 1659, 1435, 1269, 1005, 858, 731;  $^1\text{H}$  NMR (300 MHz,  $\text{CDCl}_3$ )  $\delta$  6.99 (dt, 1H,  $J = 15.7, 6.9$  Hz), 5.81 (dt, 1H,  $J = 15.7, 1.5$  Hz), 3.72 (s, 3H), 2.29 (t, 2H,  $J = 7.2$  Hz), 2.32–2.12 (m, 4H), 2.05 (t, 2H,  $J = 7.6$  Hz), 1.78 (quint, 2H,  $J = 7.2$  Hz), 1.50 (quint, 2H,  $J = 7.6$  Hz), 0.97 (t, 9H,  $J = 8.0$  Hz), 0.63 (q, 6H,  $J = 8.0$  Hz);  $^{13}\text{C}$  NMR (75 MHz,  $\text{CDCl}_3$ )  $\delta$  167.3, 149.9, 147.3, 120.8, 115.6, 51.2, 33.6, 32.0, 30.7, 25.6, 19.7, 6.46, 5.27; LRMS (EI)  $m/z$  324 ( $\text{M}^+$ ); *Anal* calcd for  $\text{C}_{18}\text{H}_{32}\text{O}_3\text{Si}$ : C, 66.62; H, 9.94; found C, 66.57; H, 9.95.

**Methyl (2*Z*)-6-(2-Triethylsilyloxy-1-cyclopentenyl)-2-hexenoate ((*Z*)-11).** To the mixture of **19** (150 mg, 0.555 mmol) in DMSO (1.1 mL) was added  $\text{Et}_3\text{N}$  (0.77 mL, 5.52 mmol) and the

mixture was stirred for 30 min. To the mixture,  $\text{SO}_3\cdot\text{Py}$  (440 mg, 2.76 mmol) was added and stirred for 2 h. The resulting mixture was quenched with  $\text{H}_2\text{O}$  and extracted 3 times with  $\text{Et}_2\text{O}$ . Combined organic layer was washed with saturated aqueous  $\text{NH}_4\text{Cl}$ , saturated aqueous  $\text{NaHCO}_3$  and brine, dried and concentrated to afford crude aldehyde, which was used in the next reaction without further purification.

To a solution of  $(\text{CF}_3\text{CH}_2\text{O})_2\text{POCH}_2\text{CO}_2\text{Me}$  (0.120 mL, 0.567 mmol) and 18-crown-6 (730 mg, 2.76 mmol) in THF (10.0 mL) was added 0.5 M  $\text{KHMDs}$ -toluene (1.1 mL, 0.550 mmol) and solution of the above aldehyde in THF (1.0 mL) at  $-78\text{ }^\circ\text{C}$  and the mixture was stirred for 1.5 h. The resulting mixture was quenched with saturated aqueous  $\text{NH}_4\text{Cl}$ , extracted with  $\text{Et}_2\text{O}$ . Combined organic layer was dried and concentrated. The residue was purified by column chromatography on silica gel with 2%  $\text{Et}_2\text{O}$ /hexane to afford (*Z*)-**11** (79.5 mg, 44% for 2 steps) as colorless oil: IR (neat,  $\text{cm}^{-1}$ ) 2954, 2876, 1727, 1681, 1646, 1437, 1198, 1174, 1017, 729;  $^1\text{H}$  NMR (300 MHz,  $\text{CDCl}_3$ ) 6.26 (dt, 1H,  $J = 11.5, 5.8$  Hz), 5.76 (dt, 1H,  $J = 11.5, 1.6$  Hz), 3.70 (s, 3H), 2.63 (dddd, 2H,  $J = 7.5, 7.5, 7.5, 1.6$  Hz), 2.30 (br t, 2H,  $J = 6.3$  Hz), 2.19 (br t, 2H,  $J = 7.1$  Hz), 2.07 (br t, 2H,  $J = 7.6$  Hz), 1.85–1.72 (m, 2H), 1.60–1.35 (m, 2H), 0.98 (t, 9H,  $J = 7.8$  Hz), 0.64 (q, 6H,  $J = 7.8$  Hz); LRMS (EI)  $m/z$  324 ( $\text{M}^+$ ). HRMS  $m/z$  calcd. for  $\text{C}_{18}\text{H}_{32}\text{O}_3\text{Si}$ , 324.2121; found 324.2148.

**(1*S*<sup>\*</sup>, 2*R*<sup>\*</sup>, 3*R*<sup>\*</sup>, 7*S*<sup>\*</sup>)-2-Methoxycarbonyl-1-(triethylsiloxy)tricyclo[5. 3. 0. 0<sup>3,7</sup>]decane (12).**

IR (neat,  $\text{cm}^{-1}$ ) 2952, 1733, 1435, 1201, 1222, 1121, 745, 668;  $^1\text{H}$  NMR (300 MHz,  $\text{CDCl}_3$ )  $\delta$  3.69 (s, 3H), 2.63 (dd, 1H,  $J = 6.3, 1.2$  Hz), 2.22 (br t, 1H,  $J = 6.3$  Hz), 1.97–1.86 (m, 2H), 1.85–1.62 (m, 4H), 1.61–1.42 (m, 4H), 1.32–1.18 (m, 2H), 0.96 (t, 9H,  $J = 8.0$  Hz), 0.61 (q, 6H,  $J = 8.0$  Hz);  $^{13}\text{C}$  NMR (75 MHz,  $\text{CDCl}_3$ )  $\delta$  173.0, 82.3, 58.8, 53.8, 50.9, 38.2, 37.6, 35.2,

32.2, 30.2, 25.8, 24.2, 6.84, 5.95; LRMS (EI)  $m/z$  324 ( $M^+$ ); *Anal* calcd for  $C_{18}H_{32}O_3Si$ ; C, 66.62; H, 9.94, found C, 66.34; H, 9.88.

### Determination of Relative Stereochemistry of Cyclobutanes (selected examples).

Scheme S-3.

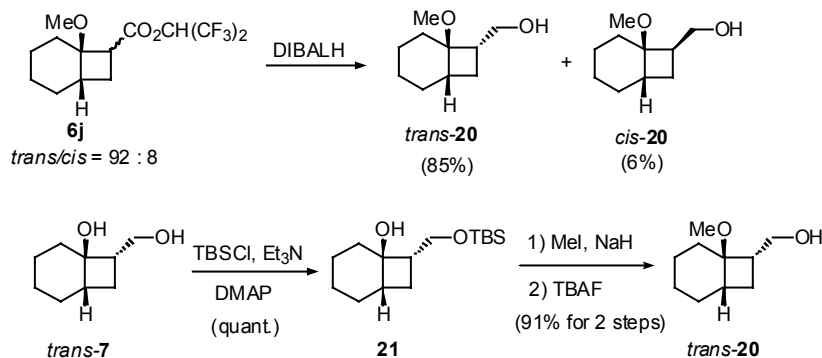

**Stereochemistry of 6j (Scheme S-3);** A diastereomeric mixture of *trans*- and *cis*-**6j** was reduced to afford two diastereomeric alcohols, which are separable. The major product was consistent with *trans*-**20** which was prepared from *trans*-**7**. Hence, the stereochemistry of the major diastereomer of **6j** was assigned as a *trans* isomer.

**trans-20 from 6j;** To a solution of **6j** (120 mg, 0.359 mmol) in  $CH_2Cl_2$  (1.0 mL) was added 1 M DIBALH–hexane (0.90 mL, 0.90 mmol) at  $-78\text{ }^\circ\text{C}$  and stirred for 10 h at room temperature. After addition of MeOH (1.0 mL) and Et<sub>2</sub>O (6.0 mL), the mixture was stirred for 3 h, filtered through Celite and evaporated. The residue was purified by column chromatography on silica gel with 50% Et<sub>2</sub>O/hexane to give *trans*-**20** (52.0 mg, 85%) and *cis*-**20** (3.8 mg, 6%) as colorless oil. *trans*-**20**; IR (neat,  $cm^{-1}$ ) 3386 (br), 2932, 2856, 1463, 1288, 1188, 1138, 1100, 1041, 989; <sup>1</sup>H NMR (300 MHz,  $CDCl_3$ )  $\delta$  3.74–3.52 (m, 2H), 3.26 (s, 3H), 2.42–2.25 (m, 2H), 1.84 (brd, 1H,  $J = 11.8$  Hz), 1.73 (q, 1H,  $J = 9.2$  Hz), 1.68 (brs, 1H), 1.64–1.18 (m, 7H), 1.09 (q, 1H,  $J = 10.3$  Hz); <sup>13</sup>C NMR (75 MHz,  $CDCl_3$ )  $\delta$  78.5, 62.4, 50.5, 43.7, 36.3, 25.2, 24.0, 21.4, 20.2, 19.7; LRMS (EI)  $m/z$  152 ( $M^+ - 18$ ). HRMS calcd for  $C_{10}H_{16}O$ , 152.1201; found 152.1214.

***trans*-20 from *trans*-7.** To a solution of *trans*-7 (218 mg, 1.40 mmol), Et<sub>3</sub>N (0.30 mL, 2.15 mmol) and DMAP (catalytic amount) in CH<sub>2</sub>Cl<sub>2</sub> (3.0 mL) was added TBSCl (230 mg, 1.53 mmol) at 0 °C and stirred for 1 d at ambient temperature. The resulting mixture was quenched with H<sub>2</sub>O, extracted with AcOEt, dried and concentrated. The residue was purified by column chromatography on silica gel with 30% AcOEt/hexane to give **21** (378 mg, quant.) as colorless oil; <sup>1</sup>H NMR (300 MHz, CDCl<sub>3</sub>) δ 3.70–3.56 (m, 2H), 2.24–2.04 (m, 2H), 1.77 (ddd, 1H, *J* = 13.6, 13.6, 3.6 Hz), 1.69–1.00 (m, 10H), 0.89 (s, 9H), 0.04 (s, 6H); <sup>13</sup>C NMR (75 MHz, CDCl<sub>3</sub>) δ 73.7, 62.6, 48.7, 40.0, 30.2, 25.8, 23.5, 21.6, 20.2, 19.6, 18.1, 5.5; LRMS (EI) *m/z* 213 (*M*<sup>+</sup>–57). HRMS calcd for C<sub>11</sub>H<sub>21</sub>O<sub>2</sub>Si, 213.1311; found 213.1331.

To a solution of NaH (60% oil dispersion, 35 mg, 0.875 mmol) in THF (1.0 mL) was added **21** (150 mg, 0.555 mmol) and MeI (0.35 mL, 5.62 mmol) and stirred for 1.5 h at room temperature. The resulting mixture was cooled to 0 °C, quenched with saturated aqueous NH<sub>4</sub>Cl, extracted with Et<sub>2</sub>O, washed with brine, dried and concentrated to give crude oil of methyl ether.

The above crude oil was dissolved in THF (1.0 mL) and 1 M TBAF–THF (1.0 mL, 1.0 mmol) was added. After 16 h, the mixture was quenched with H<sub>2</sub>O, extracted with AcOEt, dried and concentrated. The residue was purified by column chromatography on silica gel with 60% AcOEt/hexane to give *trans*-**20** (86.3 mg, 91% for 2 steps) as colorless oil.

**NOESY experiment;** For example, NOESY results of reduced-**10e**, **10h** and **10i** are shown in Figure S-1.

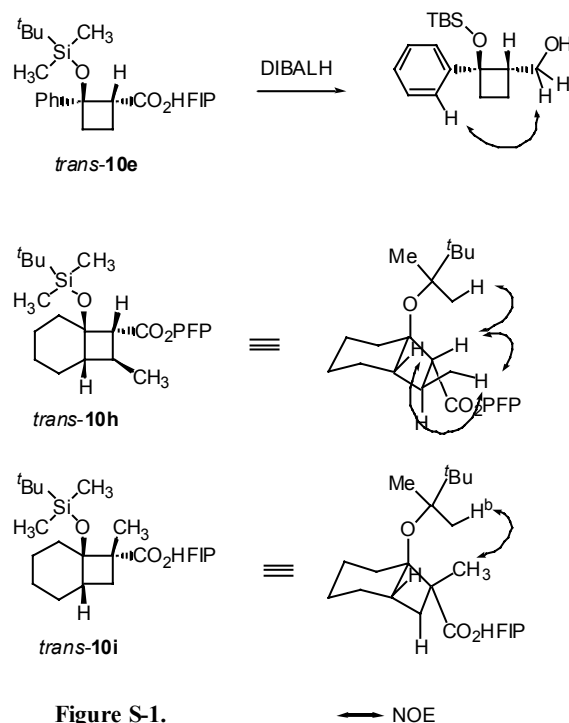

**Figure S-1.**

**$^1\text{H}$  and  $^{13}\text{C}$  NMR Data for Compounds 1, 2b, *trans*-6a, *cis*-6a, 6i–j, *cis*-7, 8, 10a, 10c, 10d', 10e, 10h, 10i and Z-11.** (For compounds lacking of elemental analysis data)



| INDEX | FREQUENCY (PPM) | HEIGHT   | AREA  | HEIGHT   | AREA  |
|-------|-----------------|----------|-------|----------|-------|
| 1     | 1.207           | 377.1864 | 1.207 | 377.1864 | 1.207 |
| 2     | 1.207           | 79.5364  | 1.207 | 79.5364  | 1.207 |
| 3     | 1.207           | 79.5364  | 1.207 | 79.5364  | 1.207 |
| 4     | 1.207           | 79.5364  | 1.207 | 79.5364  | 1.207 |
| 5     | 1.207           | 79.5364  | 1.207 | 79.5364  | 1.207 |
| 6     | 1.207           | 79.5364  | 1.207 | 79.5364  | 1.207 |
| 7     | 1.207           | 79.5364  | 1.207 | 79.5364  | 1.207 |
| 8     | 1.207           | 79.5364  | 1.207 | 79.5364  | 1.207 |
| 9     | 1.207           | 79.5364  | 1.207 | 79.5364  | 1.207 |
| 10    | 1.207           | 79.5364  | 1.207 | 79.5364  | 1.207 |
| 11    | 1.207           | 79.5364  | 1.207 | 79.5364  | 1.207 |
| 12    | 1.207           | 79.5364  | 1.207 | 79.5364  | 1.207 |
| 13    | 1.207           | 79.5364  | 1.207 | 79.5364  | 1.207 |
| 14    | 1.207           | 79.5364  | 1.207 | 79.5364  | 1.207 |
| 15    | 1.207           | 79.5364  | 1.207 | 79.5364  | 1.207 |
| 16    | 1.207           | 79.5364  | 1.207 | 79.5364  | 1.207 |
| 17    | 1.207           | 79.5364  | 1.207 | 79.5364  | 1.207 |
| 18    | 1.207           | 79.5364  | 1.207 | 79.5364  | 1.207 |
| 19    | 1.207           | 79.5364  | 1.207 | 79.5364  | 1.207 |
| 20    | 1.207           | 79.5364  | 1.207 | 79.5364  | 1.207 |
| 21    | 1.207           | 79.5364  | 1.207 | 79.5364  | 1.207 |
| 22    | 1.207           | 79.5364  | 1.207 | 79.5364  | 1.207 |
| 23    | 1.207           | 79.5364  | 1.207 | 79.5364  | 1.207 |
| 24    | 1.207           | 79.5364  | 1.207 | 79.5364  | 1.207 |
| 25    | 1.207           | 79.5364  | 1.207 | 79.5364  | 1.207 |
| 26    | 1.207           | 79.5364  | 1.207 | 79.5364  | 1.207 |
| 27    | 1.207           | 79.5364  | 1.207 | 79.5364  | 1.207 |
| 28    | 1.207           | 79.5364  | 1.207 | 79.5364  | 1.207 |
| 29    | 1.207           | 79.5364  | 1.207 | 79.5364  | 1.207 |
| 30    | 1.207           | 79.5364  | 1.207 | 79.5364  | 1.207 |
| 31    | 1.207           | 79.5364  | 1.207 | 79.5364  | 1.207 |
| 32    | 1.207           | 79.5364  | 1.207 | 79.5364  | 1.207 |
| 33    | 1.207           | 79.5364  | 1.207 | 79.5364  | 1.207 |
| 34    | 1.207           | 79.5364  | 1.207 | 79.5364  | 1.207 |
| 35    | 1.207           | 79.5364  | 1.207 | 79.5364  | 1.207 |
| 36    | 1.207           | 79.5364  | 1.207 | 79.5364  | 1.207 |
| 37    | 1.207           | 79.5364  | 1.207 | 79.5364  | 1.207 |
| 38    | 1.207           | 79.5364  | 1.207 | 79.5364  | 1.207 |
| 39    | 1.207           | 79.5364  | 1.207 | 79.5364  | 1.207 |
| 40    | 1.207           | 79.5364  | 1.207 | 79.5364  | 1.207 |
| 41    | 1.207           | 79.5364  | 1.207 | 79.5364  | 1.207 |
| 42    | 1.207           | 79.5364  | 1.207 | 79.5364  | 1.207 |
| 43    | 1.207           | 79.5364  | 1.207 | 79.5364  | 1.207 |
| 44    | 1.207           | 79.5364  | 1.207 | 79.5364  | 1.207 |
| 45    | 1.207           | 79.5364  | 1.207 | 79.5364  | 1.207 |
| 46    | 1.207           | 79.5364  | 1.207 | 79.5364  | 1.207 |
| 47    | 1.207           | 79.5364  | 1.207 | 79.5364  | 1.207 |

**1** ( $^{13}\text{C}$ -NMR)

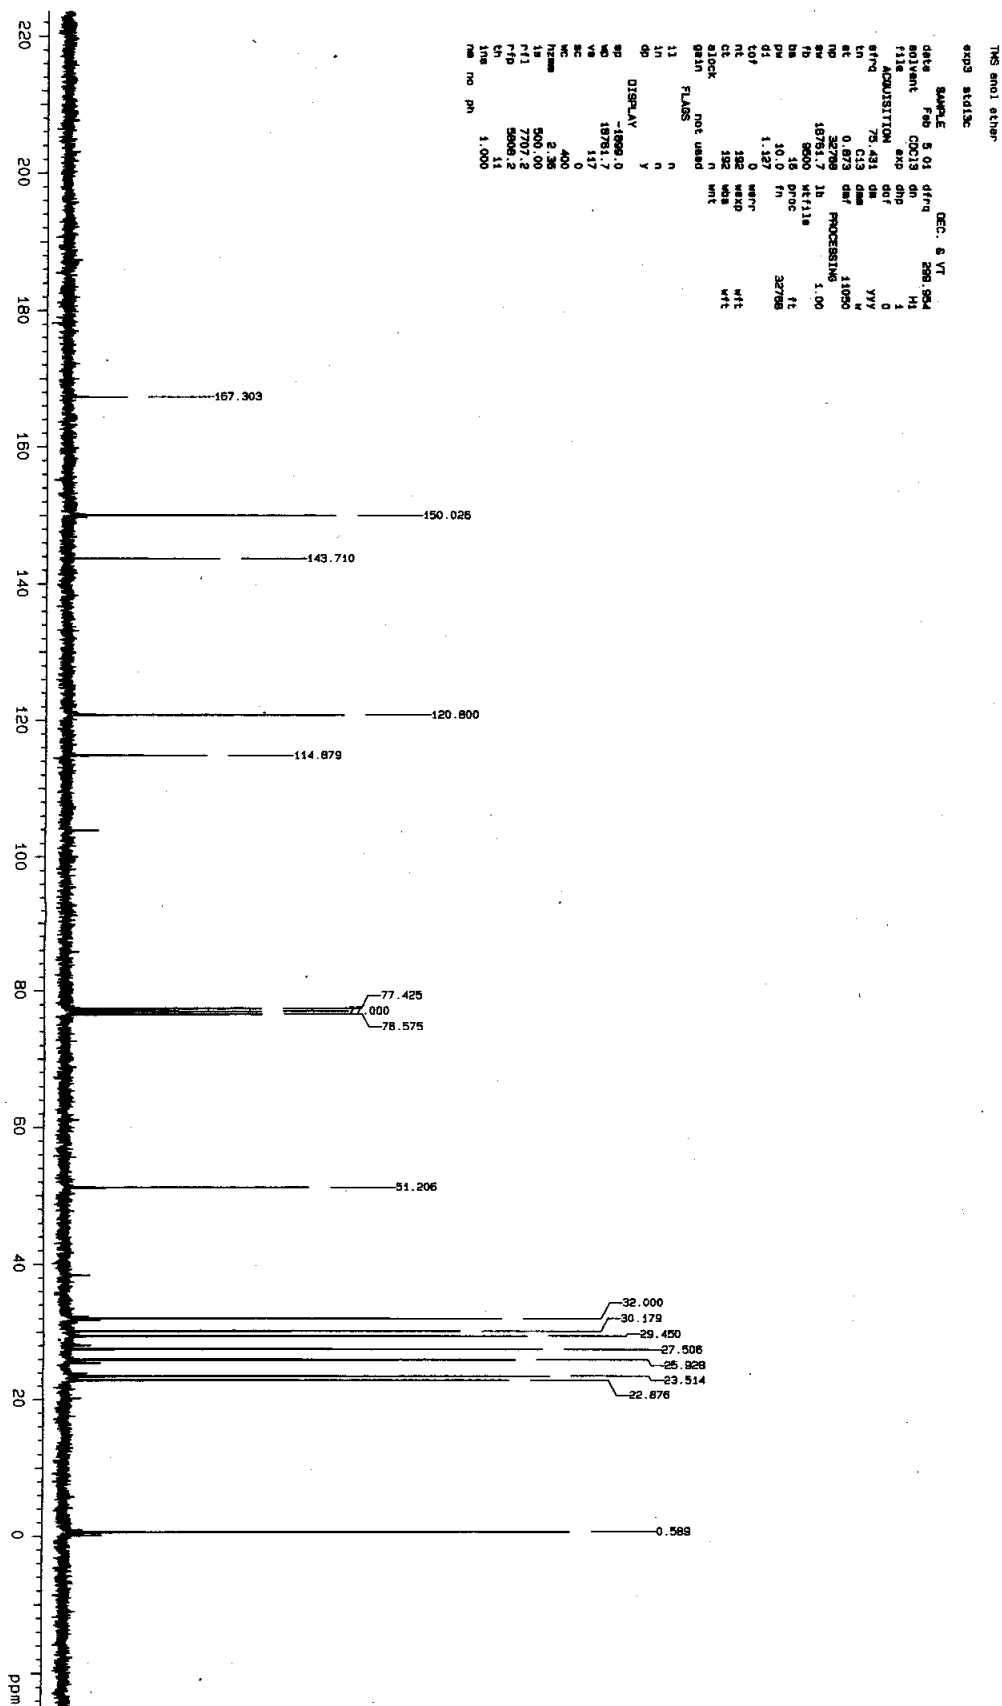

**2 (<sup>1</sup>H-NMR)**

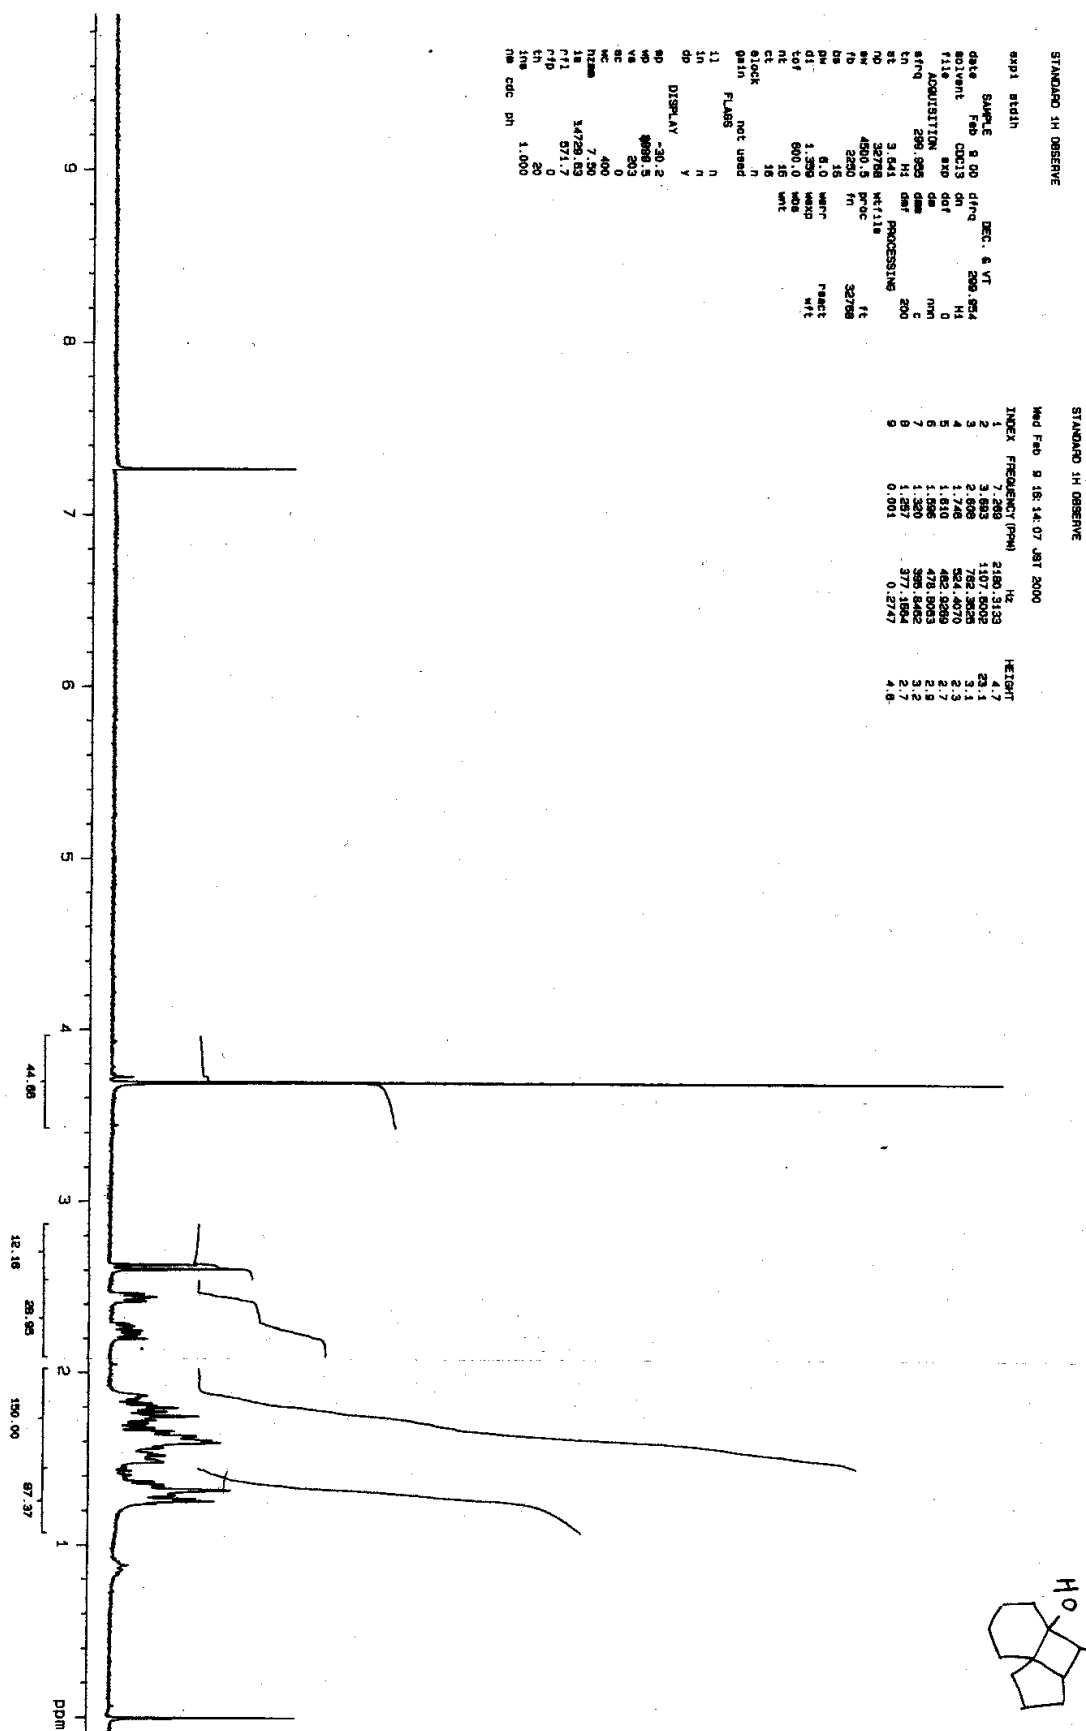

[illegible]

*trans*-6a (<sup>13</sup>C-NMR)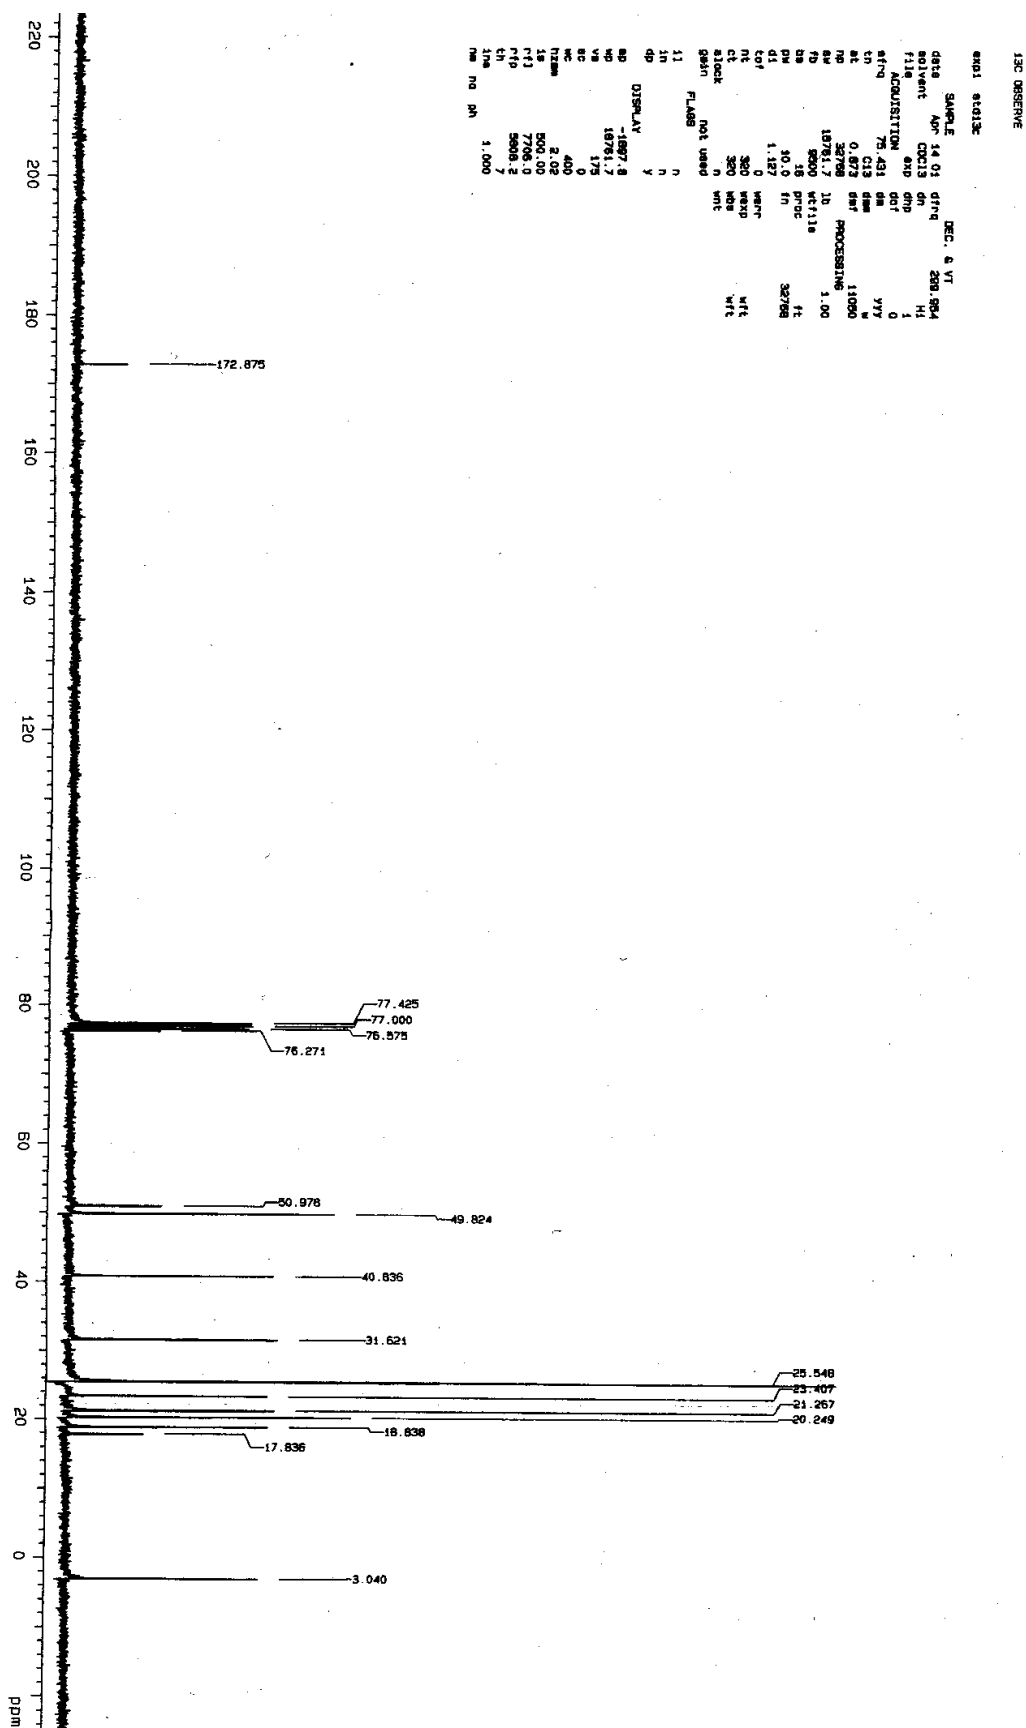

*cis*-**6a** (<sup>1</sup>H-NMR)

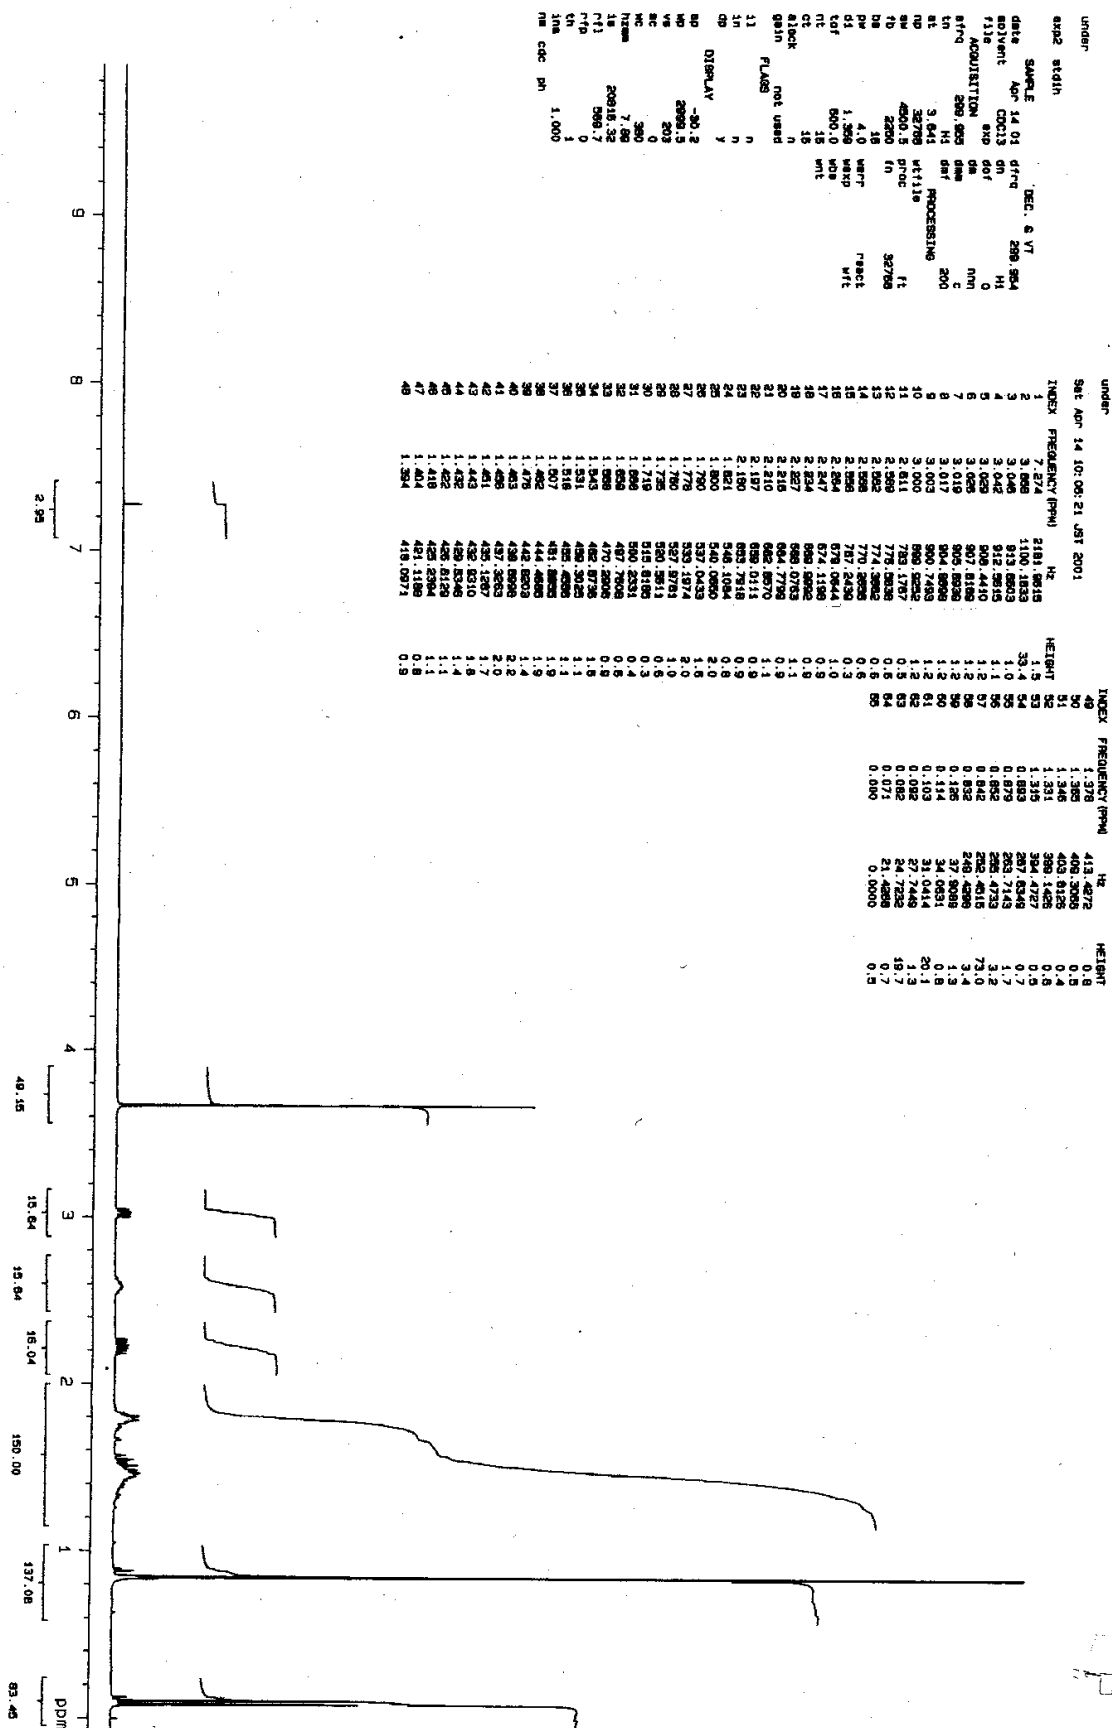

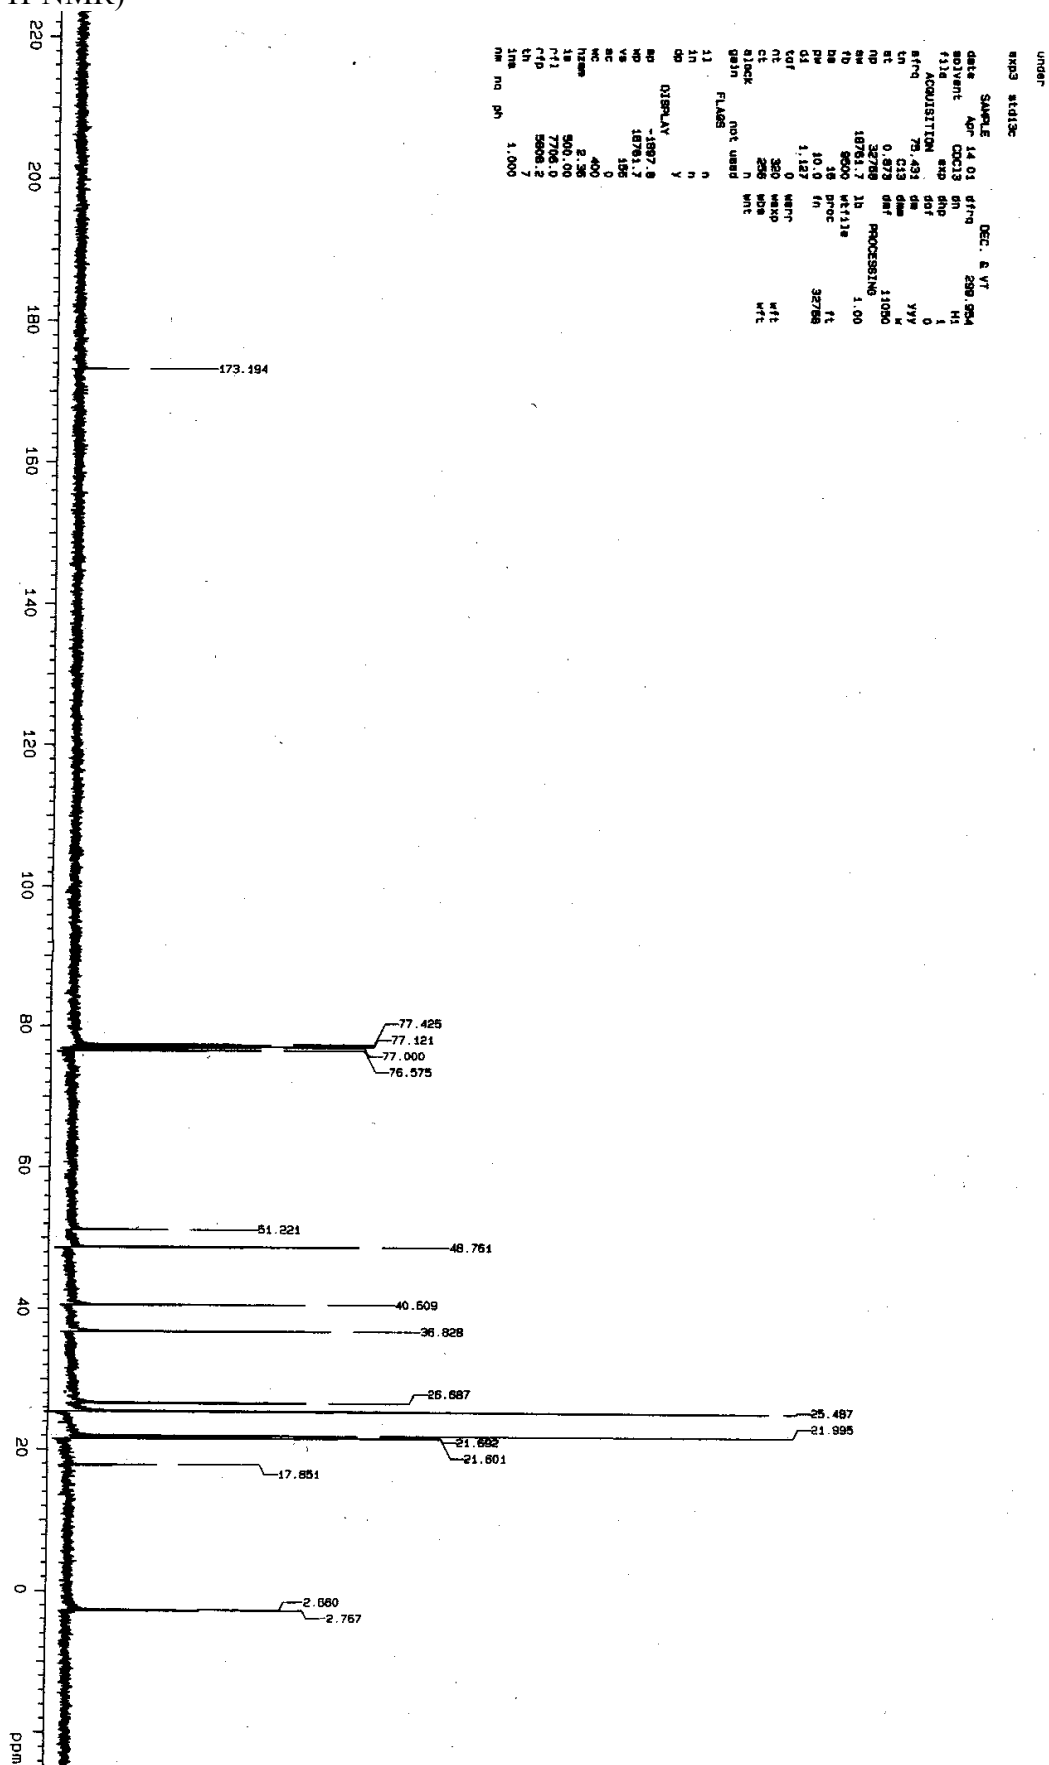

ppm  
-0.15  
-

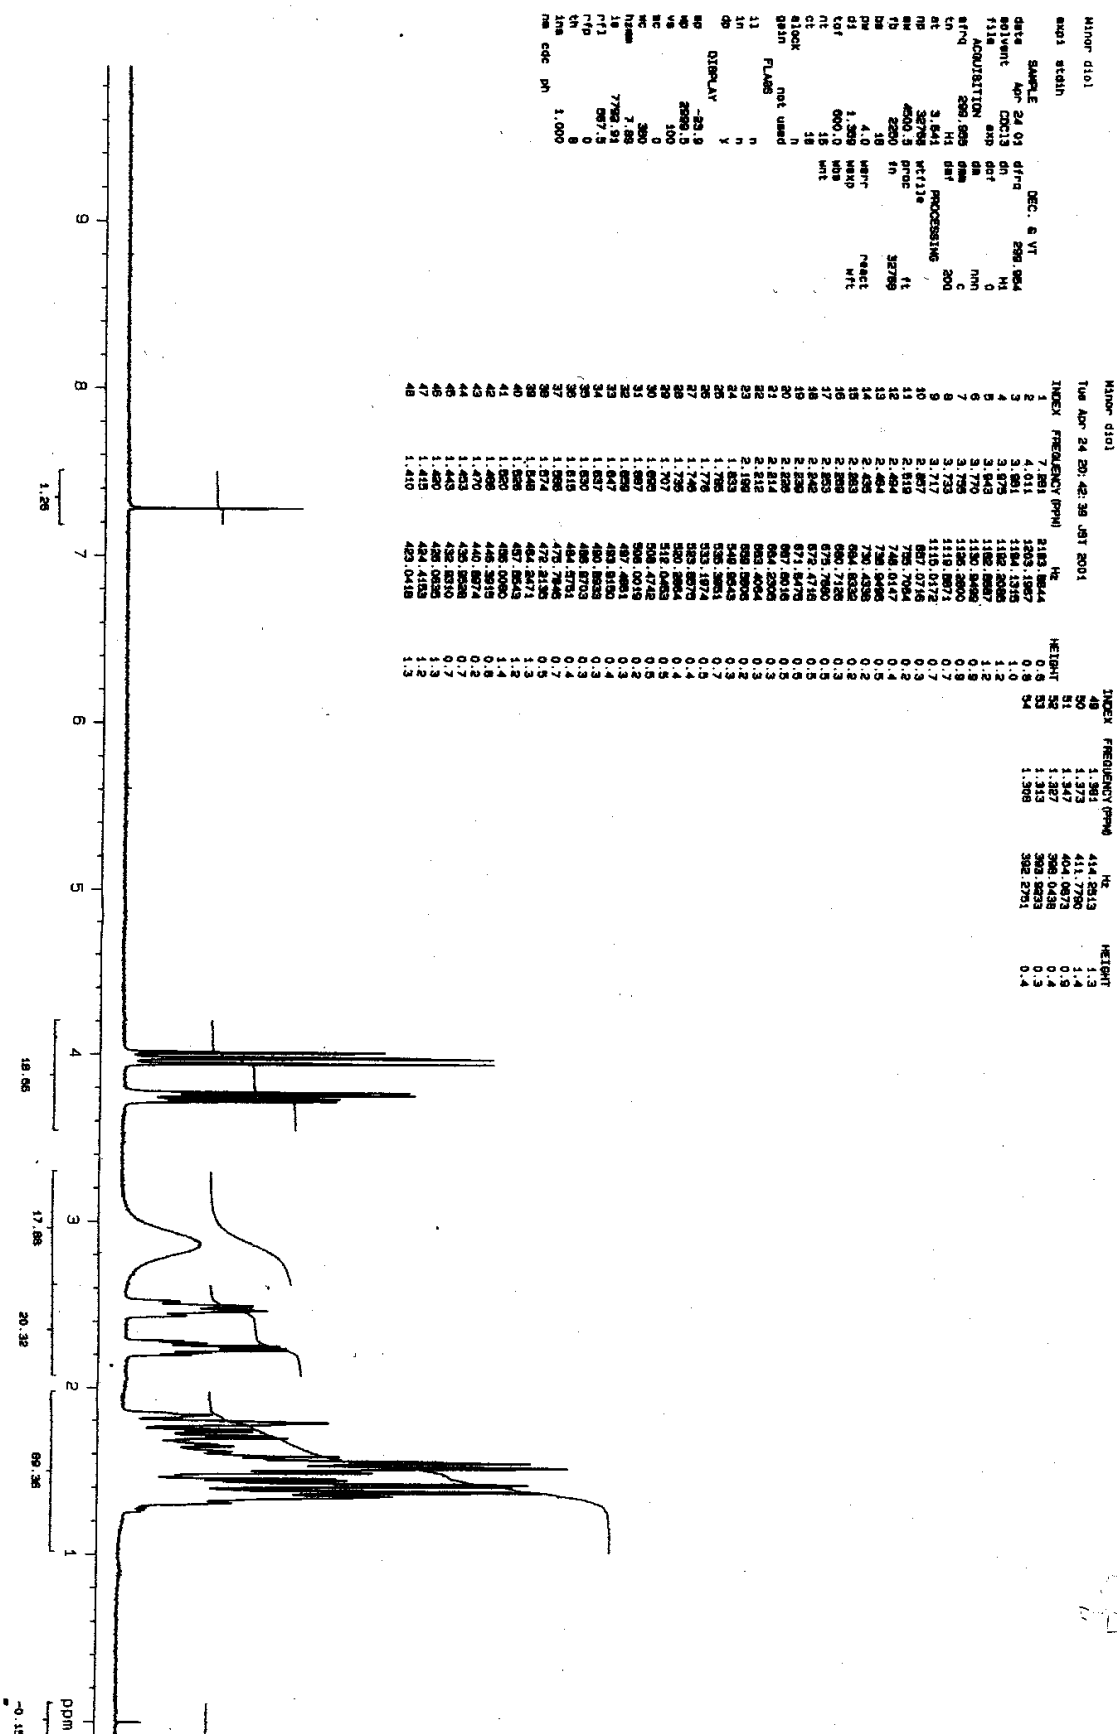



13C OBSERVE

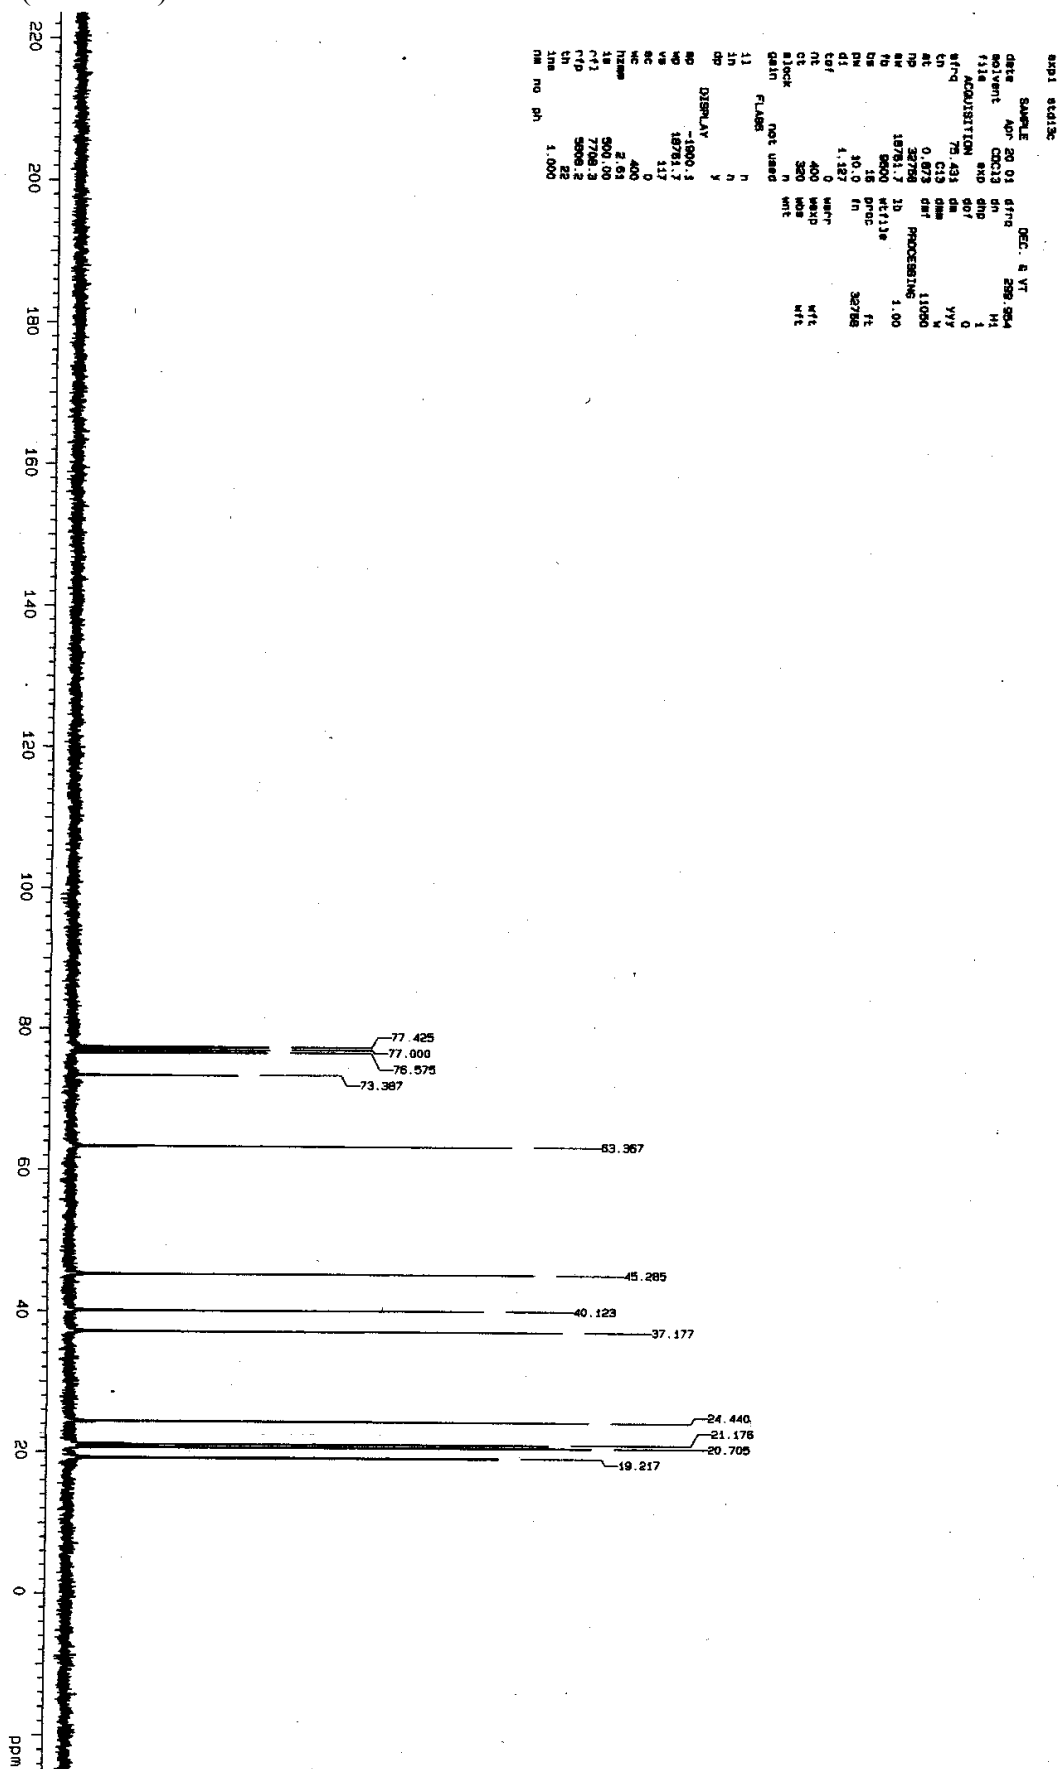

ppm  
1.34

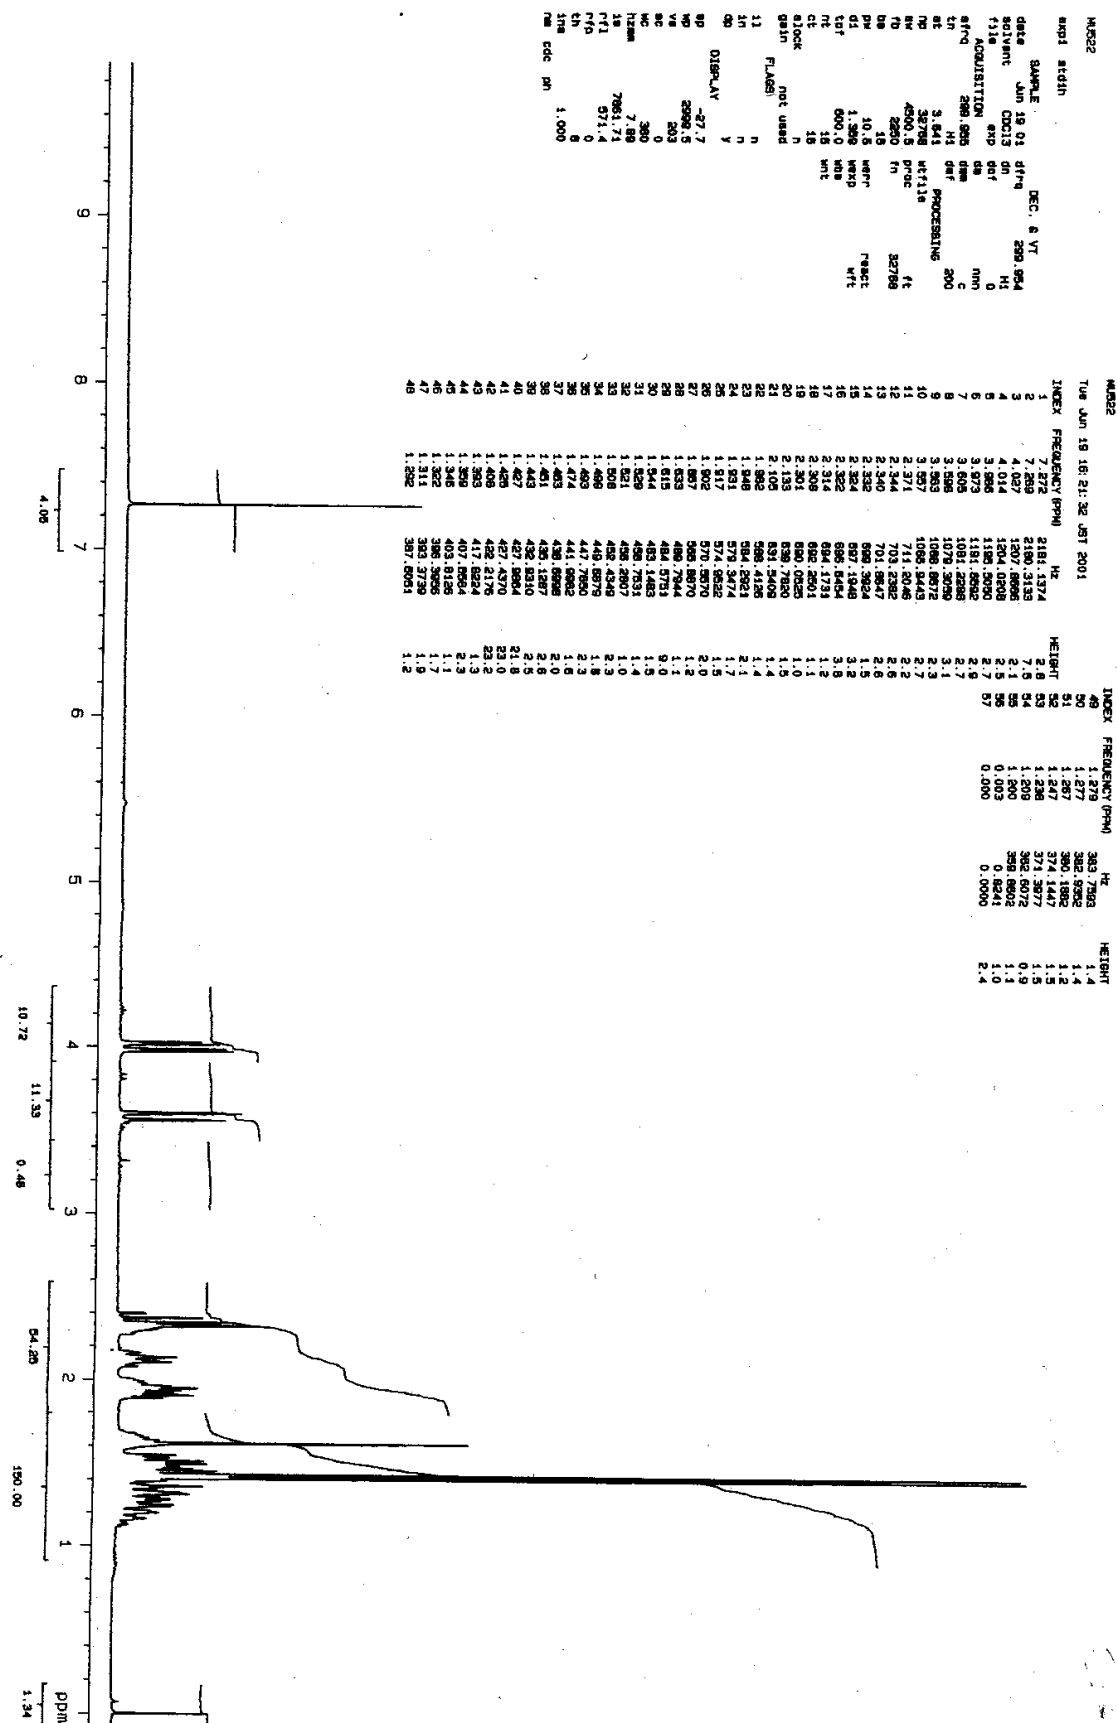

8 ( $^{13}\text{C}$ -NMR)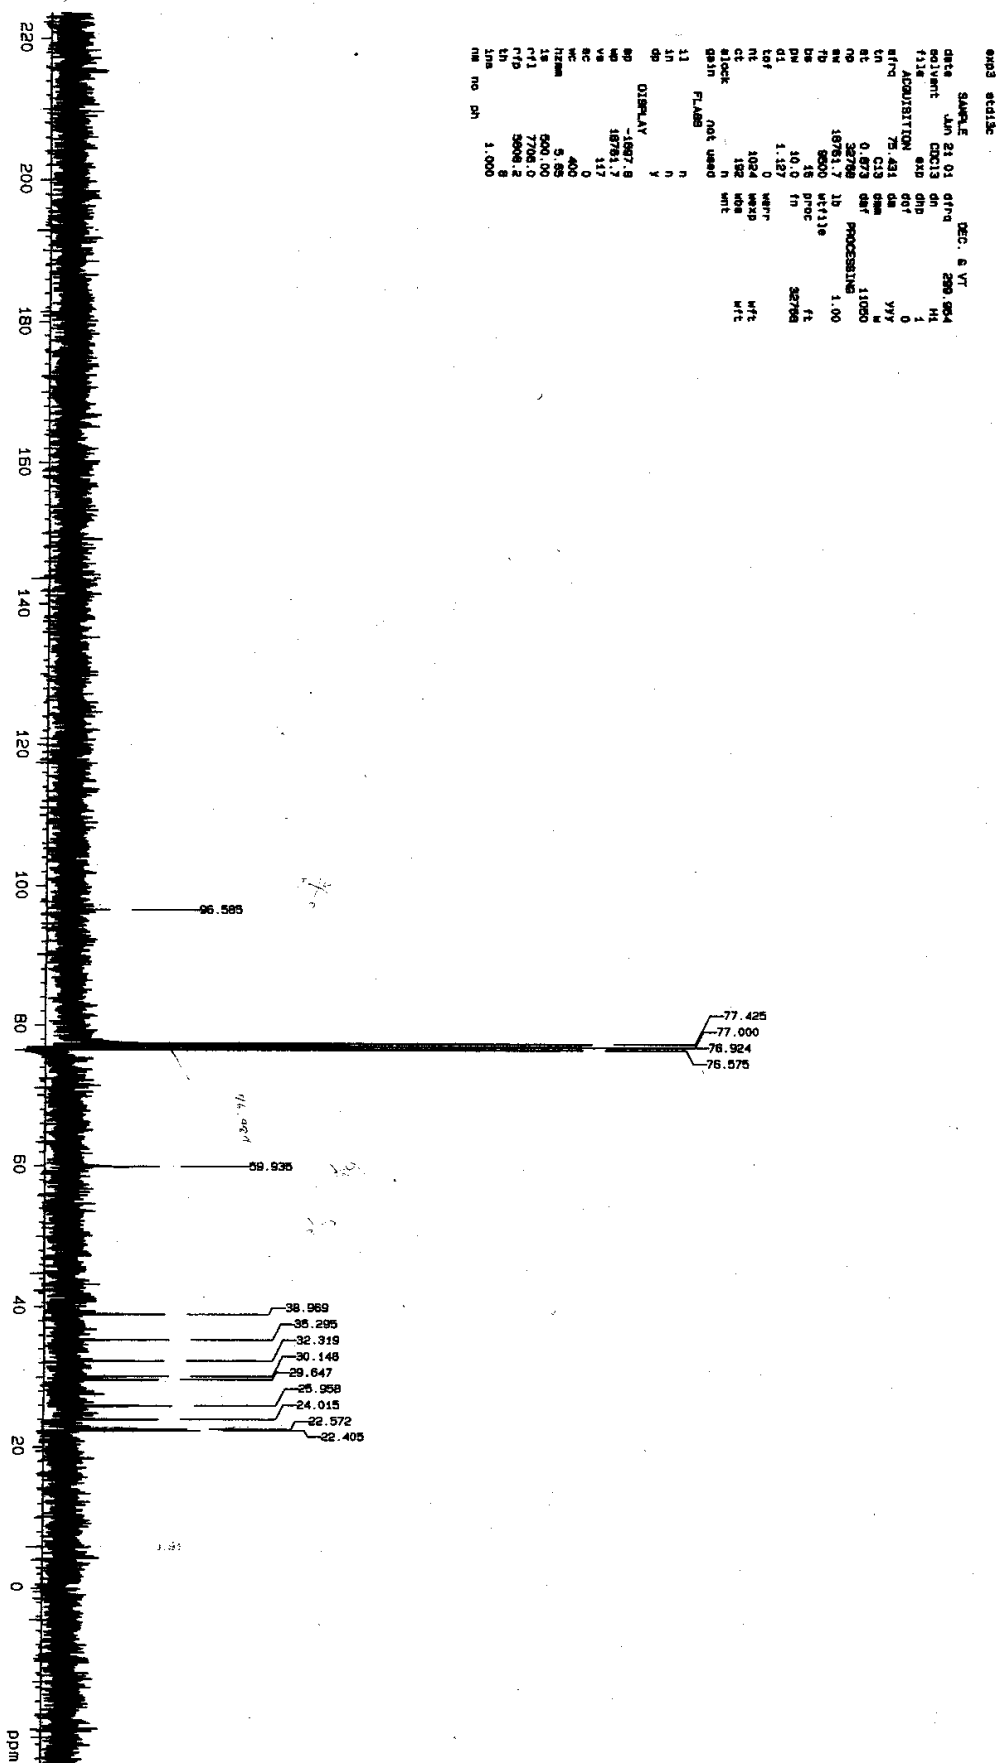



MU592

```

TIPS product
Thu Sep 13 21:30:02 JST 2001
INDEX FREQUENCY (PPM)      HZ
4      7.028      547.5

```

| INDEX | FREQUENCY (PPM) | H <sub>2</sub> | HEIGHT |
|-------|-----------------|----------------|--------|
| 49    | -0.003          | -0.8241        | 5.3    |

| INDEX | HEIGHT (mm) | Hz         | INDEX |       |           |          |     |
|-------|-------------|------------|-------|-------|-----------|----------|-----|
| 1     | 7.2680      | 21.75 4891 | 17    | 8.107 | 632.0054  | 4.2      |     |
| 2     | 8.052       | 19.17 5003 | 18    | 8.237 | 73.5218   | 3.7      |     |
| 3     | 8.052       | 19.17 5003 | 19    | 8.401 | 726.2898  | 1.6      |     |
| 4     | 8.807       | 17.41 8882 | 20    | 8.399 | 7.00 2898 | 1.6      |     |
| 5     | 8.604       | 17.41 0041 | 21    | 8.636 | 599.7784  | 2.7      |     |
| 6     | 8.768       | 17.95 5700 | 22    | 8.679 | 841.8878  | 2.2      |     |
| 7     | 8.768       | 17.95 5700 | 23    | 8.778 | 30.3586   | 3.8      |     |
| 8     | 8.768       | 17.95 5700 | 24    | 8.778 | 1.778     | 508.5720 | 4.2 |
| 9     | 8.745       | 17.95 5700 | 25    | 8.851 | 70.7570   | 5.4      |     |
| 10    | 8.745       | 17.95 5700 | 26    | 8.851 | 70.7570   | 5.4      |     |
| 11    | 8.114       | 9.62 2264  | 27    | 8.851 | 70.7570   | 5.4      |     |
| 12    | 8.107       | 632.0054   | 28    | 8.851 | 70.7570   | 5.4      |     |
| 13    | 8.401       | 726.2898   | 29    | 8.851 | 70.7570   | 5.4      |     |
| 14    | 8.437       | 73.5218    | 30    | 8.851 | 70.7570   | 5.4      |     |
| 15    | 8.401       | 726.2898   | 31    | 8.851 | 70.7570   | 5.4      |     |
| 16    | 8.399       | 7.00 2898  | 32    | 8.851 | 70.7570   | 5.4      |     |
| 17    | 8.351       | 70.7570    | 33    | 8.851 | 70.7570   | 5.4      |     |
| 18    | 8.237       | 73.5218    | 34    | 8.851 | 70.7570   | 5.4      |     |
| 19    | 8.237       | 73.5218    | 35    | 8.851 | 70.7570   | 5.4      |     |
| 20    | 8.399       | 7.00 2898  | 36    | 8.851 | 70.7570   | 5.4      |     |
| 21    | 8.636       | 599.7784   | 37    | 8.851 | 70.7570   | 5.4      |     |
| 22    | 8.679       | 841.8878   | 38    | 8.851 | 70.7570   | 5.4      |     |
| 23    | 8.778       | 30.3586    | 39    | 8.851 | 70.7570   | 5.4      |     |
| 24    | 8.778       | 1.778      | 40    | 8.851 | 70.7570   | 5.4      |     |
| 25    | 8.851       | 508.5720   | 41    | 8.851 | 70.7570   | 5.4      |     |
| 26    | 8.851       | 508.5720   | 42    | 8.851 | 70.7570   | 5.4      |     |
| 27    | 8.851       | 508.5720   | 43    | 8.851 | 70.7570   | 5.4      |     |
| 28    | 8.851       | 508.5720   | 44    | 8.851 | 70.7570   | 5.4      |     |
| 29    | 8.851       | 508.5720   | 45    | 8.851 | 70.7570   | 5.4      |     |
| 30    | 8.851       | 508.5720   | 46    | 8.851 | 70.7570   | 5.4      |     |
| 31    | 8.851       | 508.5720   | 47    | 8.851 | 70.7570   | 5.4      |     |
| 32    | 8.851       | 508.5720   | 48    | 8.851 | 70.7570   | 5.4      |     |
| 33    | 8.851       | 508.5720   | 49    | 8.851 | 70.7570   | 5.4      |     |
| 34    | 8.851       | 508.5720   | 50    | 8.851 | 70.7570   | 5.4      |     |
| 35    | 8.851       | 508.5720   | 51    | 8.851 | 70.7570   | 5.4      |     |
| 36    | 8.851       | 508.5720   | 52    | 8.851 | 70.7570   | 5.4      |     |
| 37    | 8.851       | 508.5720   | 53    | 8.851 | 70.7570   | 5.4      |     |
| 38    | 8.851       | 508.5720   | 54    | 8.851 | 70.7570   | 5.4      |     |
| 39    | 8.851       | 508.5720   | 55    | 8.851 | 70.7570   | 5.4      |     |
| 40    | 8.851       | 508.5720   | 56    | 8.851 | 70.7570   | 5.4      |     |
| 41    | 8.851       | 508.5720   | 57    | 8.851 | 70.7570   | 5.4      |     |
| 42    | 8.851       | 508.5720   | 58    | 8.851 | 70.7570   | 5.4      |     |
| 43    | 8.851       | 508.5720   | 59    | 8.851 | 70.7570   | 5.4      |     |
| 44    | 8.851       | 508.5720   | 60    | 8.851 | 70.7570   | 5.4      |     |
| 45    | 8.851       | 508.5720   | 61    | 8.851 | 70.7570   | 5.4      |     |
| 46    | 8.851       | 508.5720   | 62    | 8.851 | 70.7570   | 5.4      |     |
| 47    | 8.851       | 508.5720   | 63    | 8.851 | 70.7570   | 5.4      |     |
| 48    | 8.851       | 508.5720   | 64    | 8.851 | 70.7570   | 5.4      |     |
| 49    | 8.851       | 508.5720   | 65    | 8.851 | 70.7570   | 5.4      |     |
| 50    | 8.851       | 508.5720   | 66    | 8.851 | 70.7570   | 5.4      |     |
| 51    | 8.851       | 508.5720   | 67    | 8.851 | 70.7570   | 5.4      |     |
| 52    | 8.851       | 508.5720   | 68    | 8.851 | 70.7570   | 5.4      |     |
| 53    | 8.851       | 508.5720   | 69    | 8.851 | 70.7570   | 5.4      |     |
| 54    | 8.851       | 508.5720   | 70    | 8.851 | 70.7570   | 5.4      |     |
| 55    | 8.851       | 508.5720   | 71    | 8.851 | 70.7570   | 5.4      |     |
| 56    | 8.851       | 508.5720   | 72    | 8.851 | 70.7570   | 5        |     |

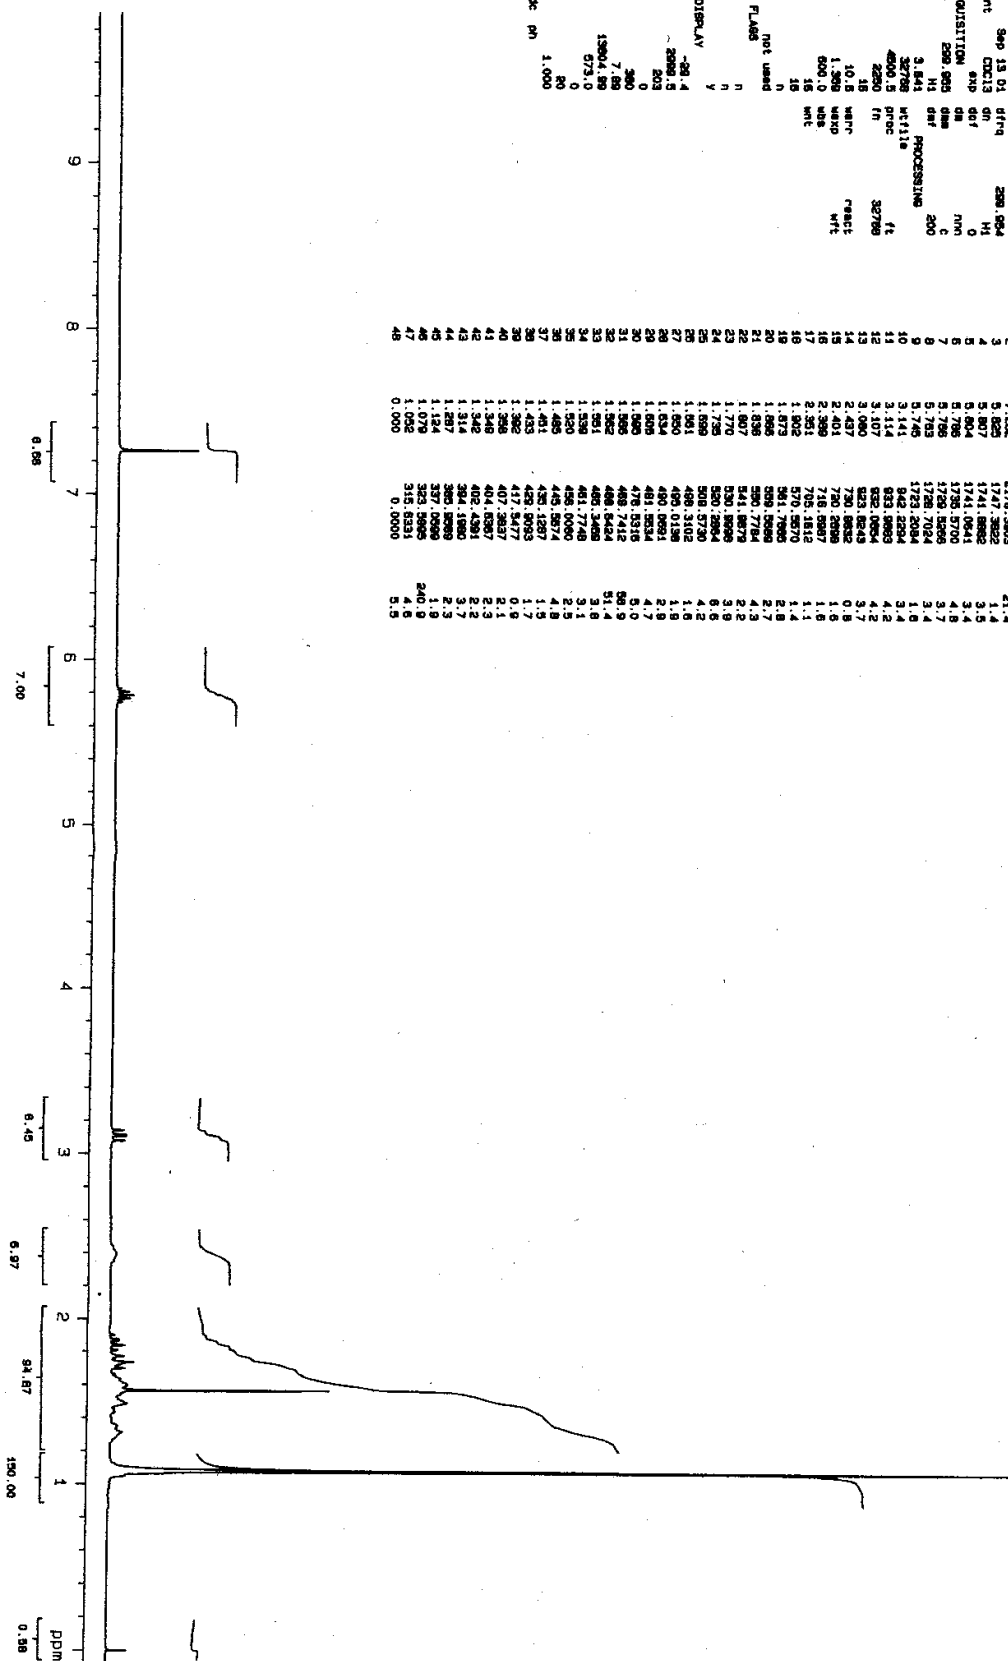



$\text{MeO}$   
 $\text{CO}_2\text{H}$   
 $\text{H}$   
 $9:2:8$

| SAMPLER     |           | Dec 12 01 | dfreq   | Dec 6 VT |
|-------------|-----------|-----------|---------|----------|
| date        | Dec 12 01 | dfreq     | 256 048 |          |
| 1111        | mt        | CDX13     | mt      | 11       |
| ACQUISITION | mt        | df        | mt      | df       |
| freq        | 256 048   | dem       |         |          |
| mt          | 3 441     |           |         |          |
| CD          | 4000 5    |           |         |          |
| mt          | 4000 5    | PRNC      |         |          |
| FD          | 2250      | fn        |         |          |
| DS          | 18        |           |         |          |
| DM          | 10 8      | WTR       | reset   |          |
| DM          | 1 3258    | WTR       |         |          |
| DM          | 800 15    | WTR       |         |          |
| mt          | 15        | WTR       |         |          |
| gain        | not used  |           |         |          |
| clock       |           |           |         |          |
| PLANS       |           |           |         |          |
| 11          | n         |           |         |          |
| 1n          | n         |           |         |          |
| do          | y         |           |         |          |
| DIBCLAV     |           |           |         |          |
| sp          | 30 2      |           |         |          |
| VS          | 2080 5    |           |         |          |
| WC          | 203       |           |         |          |
| WC          | 0         |           |         |          |
| 1212        | 400       |           |         |          |
| nm          | 7 50      |           |         |          |
| nm          | 11 33     |           |         |          |
| nm          | 571 7     |           |         |          |
| nm          | 0         |           |         |          |
| nm          | 8         |           |         |          |
| nm          | 1 000     |           |         |          |

**6j** ( $^1\text{H}$ -NMR)

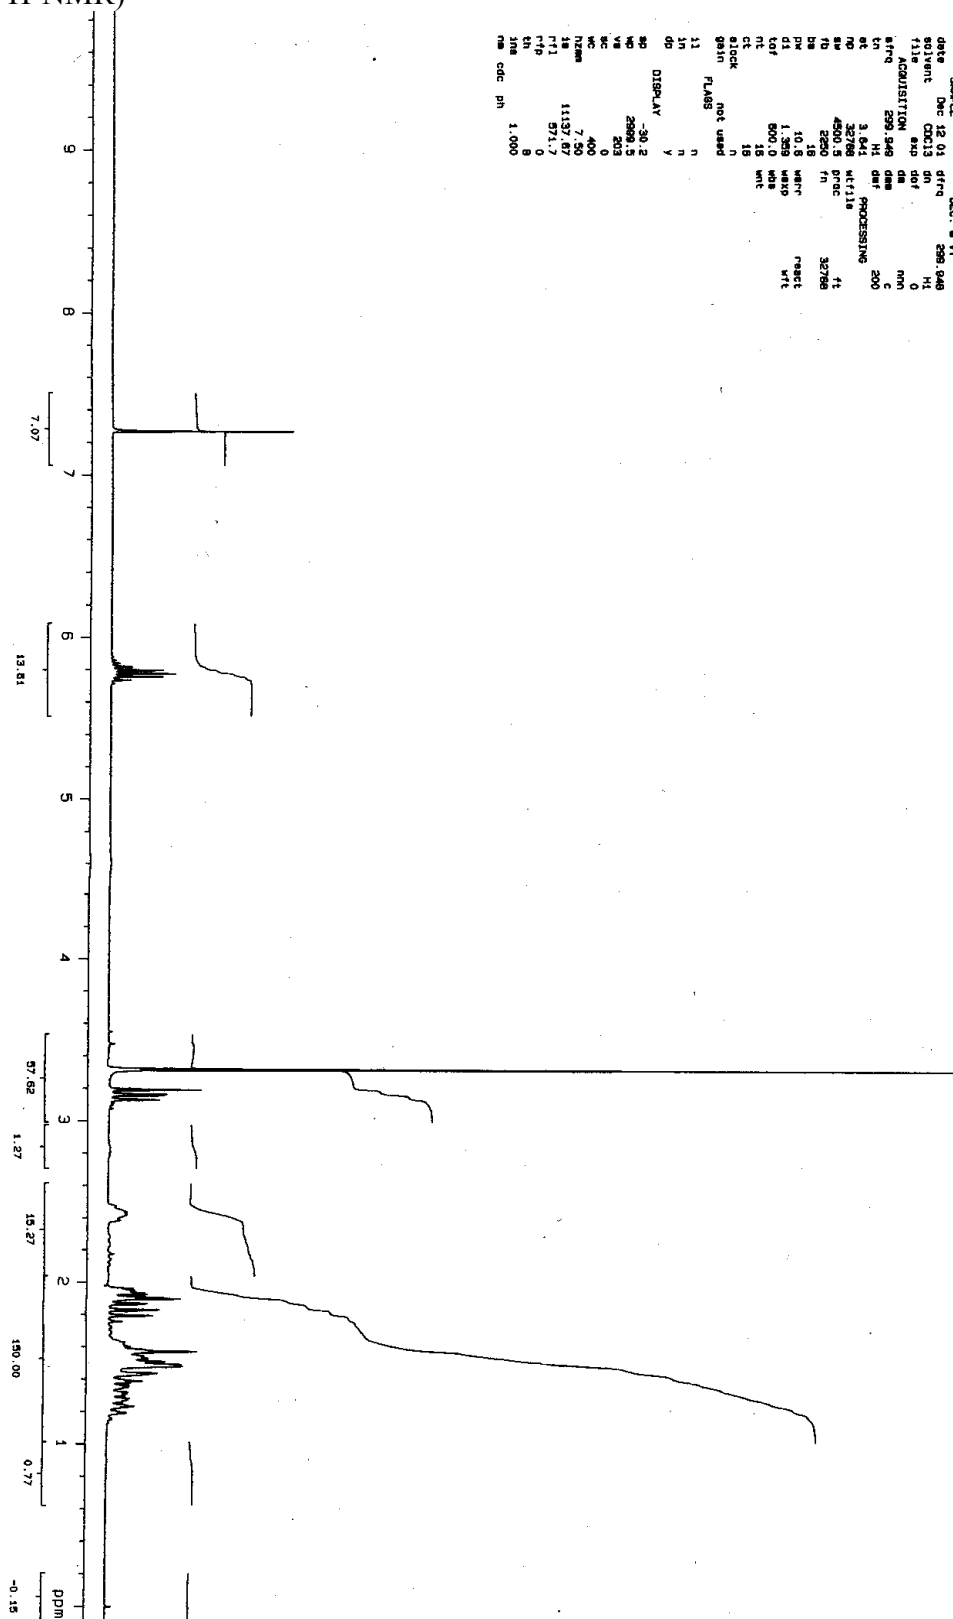

**6j** ( $^{13}\text{C}$ -NMR)

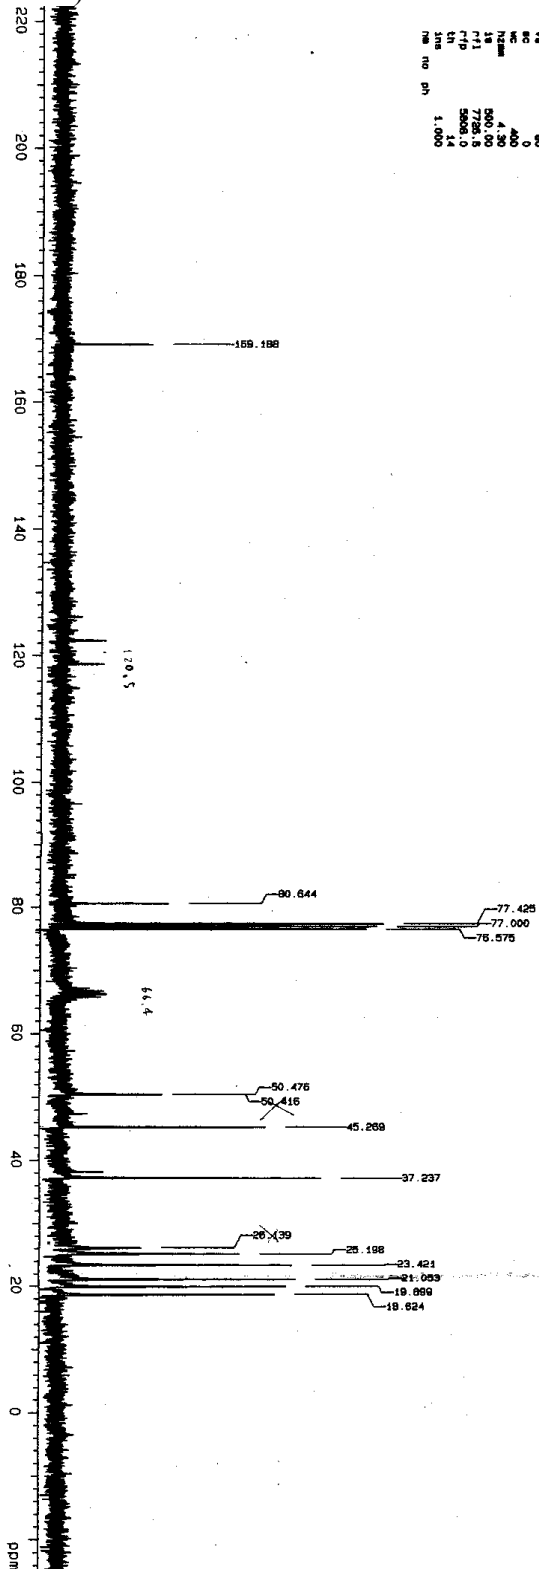

```

13C OBSERVE
#002 #013C
SAMPLE# 1000
DATE OCT 23 01
DEC. 8 VT
SOLVENT DMS-D6
H1 250.140
N1 101.253
F1 40.000
F2 40.000
F3 40.000
F4 40.000
F5 40.000
F6 40.000
F7 40.000
F8 40.000
F9 40.000
F10 40.000
F11 40.000
F12 40.000
F13 40.000
F14 40.000
F15 40.000
F16 40.000
F17 40.000
F18 40.000
F19 40.000
F20 40.000
F21 40.000
F22 40.000
F23 40.000
F24 40.000
F25 40.000
F26 40.000
F27 40.000
F28 40.000
F29 40.000
F30 40.000
F31 40.000
F32 40.000
F33 40.000
F34 40.000
F35 40.000
F36 40.000
F37 40.000
F38 40.000
F39 40.000
F40 40.000
F41 40.000
F42 40.000
F43 40.000
F44 40.000
F45 40.000
F46 40.000
F47 40.000
F48 40.000
F49 40.000
F50 40.000
F51 40.000
F52 40.000
F53 40.000
F54 40.000
F55 40.000
F56 40.000
F57 40.000
F58 40.000
F59 40.000
F60 40.000
F61 40.000
F62 40.000
F63 40.000
F64 40.000
F65 40.000
F66 40.000
F67 40.000
F68 40.000
F69 40.000
F70 40.000
F71 40.000
F72 40.000
F73 40.000
F74 40.000
F75 40.000
F76 40.000
F77 40.000
F78 40.000
F79 40.000
F80 40.000
F81 40.000
F82 40.000
F83 40.000
F84 40.000
F85 40.000
F86 40.000
F87 40.000
F88 40.000
F89 40.000
F90 40.000
F91 40.000
F92 40.000
F93 40.000
F94 40.000
F95 40.000
F96 40.000
F97 40.000
F98 40.000
F99 40.000
F100 40.000
F101 40.000
F102 40.000
F103 40.000
F104 40.000
F105 40.000
F106 40.000
F107 40.000
F108 40.000
F109 40.000
F110 40.000
F111 40.000
F112 40.000
F113 40.000
F114 40.000
F115 40.000
F116 40.000
F117 40.000
F118 40.000
F119 40.000
F120 40.000
F121 40.000
F122 40.000
F123 40.000
F124 40.000
F125 40.000
F126 40.000
F127 40.000
F128 40.000
F129 40.000
F130 40.000
F131 40.000
F132 40.000
F133 40.000
F134 40.000
F135 40.000
F136 40.000
F137 40.000
F138 40.000
F139 40.000
F140 40.000
F141 40.000
F142 40.000
F143 40.000
F144 40.000
F145 40.000
F146 40.000
F147 40.000
F148 40.000
F149 40.000
F150 40.000
F151 40.000
F152 40.000
F153 40.000
F154 40.000
F155 40.000
F156 40.000
F157 40.000
F158 40.000
F159 40.000
F160 40.000
F161 40.000
F162 40.000
F163 40.000
F164 40.000
F165 40.000
F166 40.000
F167 40.000
F168 40.000
F169 40.000
F170 40.000
F171 40.000
F172 40.000
F173 40.000
F174 40.000
F175 40.000
F176 40.000
F177 40.000
F178 40.000
F179 40.000
F180 40.000
F181 40.000
F182 40.000
F183 40.000
F184 40.000
F185 40.000
F186 40.000
F187 40.000
F188 40.000
F189 40.000
F190 40.000
F191 40.000
F192 40.000
F193 40.000
F194 40.000
F195 40.000
F196 40.000
F197 40.000
F198 40.000
F199 40.000
F200 40.000
F201 40.000
F202 40.000
F203 40.000
F204 40.000
F205 40.000
F206 40.000
F207 40.000
F208 40.000
F209 40.000
F210 40.000
F211 40.000
F212 40.000
F213 40.000
F214 40.000
F215 40.000
F216 40.000
F217 40.000
F218 40.000
F219 40.000
F220 40.000
F221 40.000
F222 40.000
F223 40.000
F224 40.000
F225 40.000
F226 40.000
F227 40.000
F228 40.000
F229 40.000
F230 40.000
F231 40.000
F232 40.000
F233 40.000
F234 40.000
F235 40.000
F236 40.000
F237 40.000
F238 40.000
F239 40.000
F240 40.000
F241 40.000
F242 40.000
F243 40.000
F244 40.000
F245 40.000
F246 40.000
F247 40.000
F248 40.000
F249 40.000
F250 40.000
F251 40.000
F252 40.000
F253 40.000
F254 40.000
F255 40.000
F256 40.000
F257 40.000
F258 40.000
F259 40.000
F260 40.000
F261 40.000
F262 40.000
F263 40.000
F264 40.000
F265 40.000
F266 40.000
F267 40.000
F268 40.000
F269 40.000
F270 40.000
F271 40.000
F272 40.000
F273 40.000
F274 40.000
F275 40.000
F276 40.000
F277 40.000
F278 40.000
F279 40.000
F280 40.000
F281 40.000
F282 40.000
F283 40.000
F284 40.000
F285 40.000
F286 40.000
F287 40.000
F288 40.000
F289 40.000
F290 40.000
F291 40.000
F292 40.000
F293 40.000
F294 40.000
F295 40.000
F296 40.000
F297 40.000
F298 40.000
F299 40.000
F300 40.000
F301 40.000
F302 40.000
F303 40.000
F304 40.000
F305 40.000
F306 40.000
F307 40.000
F308 40.000
F309 40.000
F310 40.000
F311 40.000
F312 40.000
F313 40.000
F314 40.000
F315 40.000
F316 40.000
F317 40.000
F318 40.000
F319 40.000
F320 40.000
F321 40.000
F322 40.000
F323 40.000
F324 40.000
F325 40.000
F326 40.000
F327 40.000
F328 40.000
F329 40.000
F330 40.000
F331 40.000
F332 40.000
F333 40.000
F334 40.000
F335 40.000
F336 40.000
F337 40.000
F338 40.000
F339 40.000
F340 40.000
F341 40.000
F342 40.000
F343 40.000
F344 40.000
F345
```

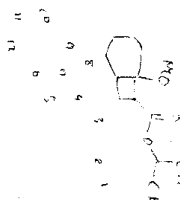



10a ( $^1\text{H}$ -NMR)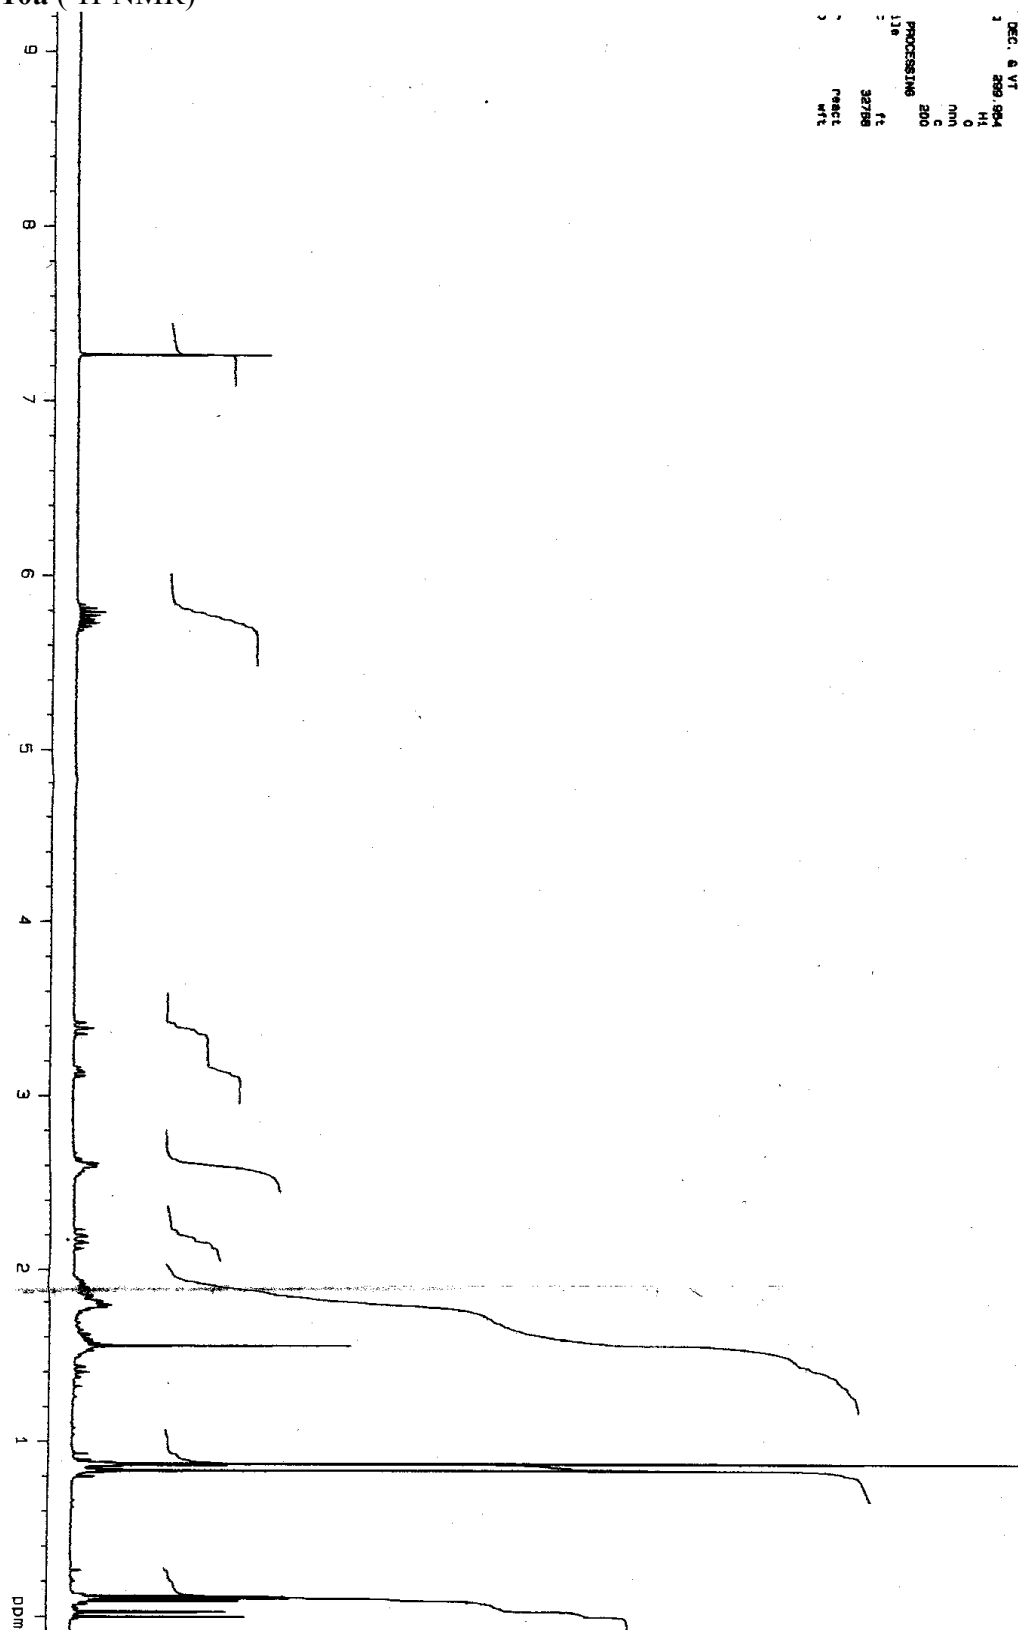

**10a** ( $^{13}\text{C}$ -NMR)

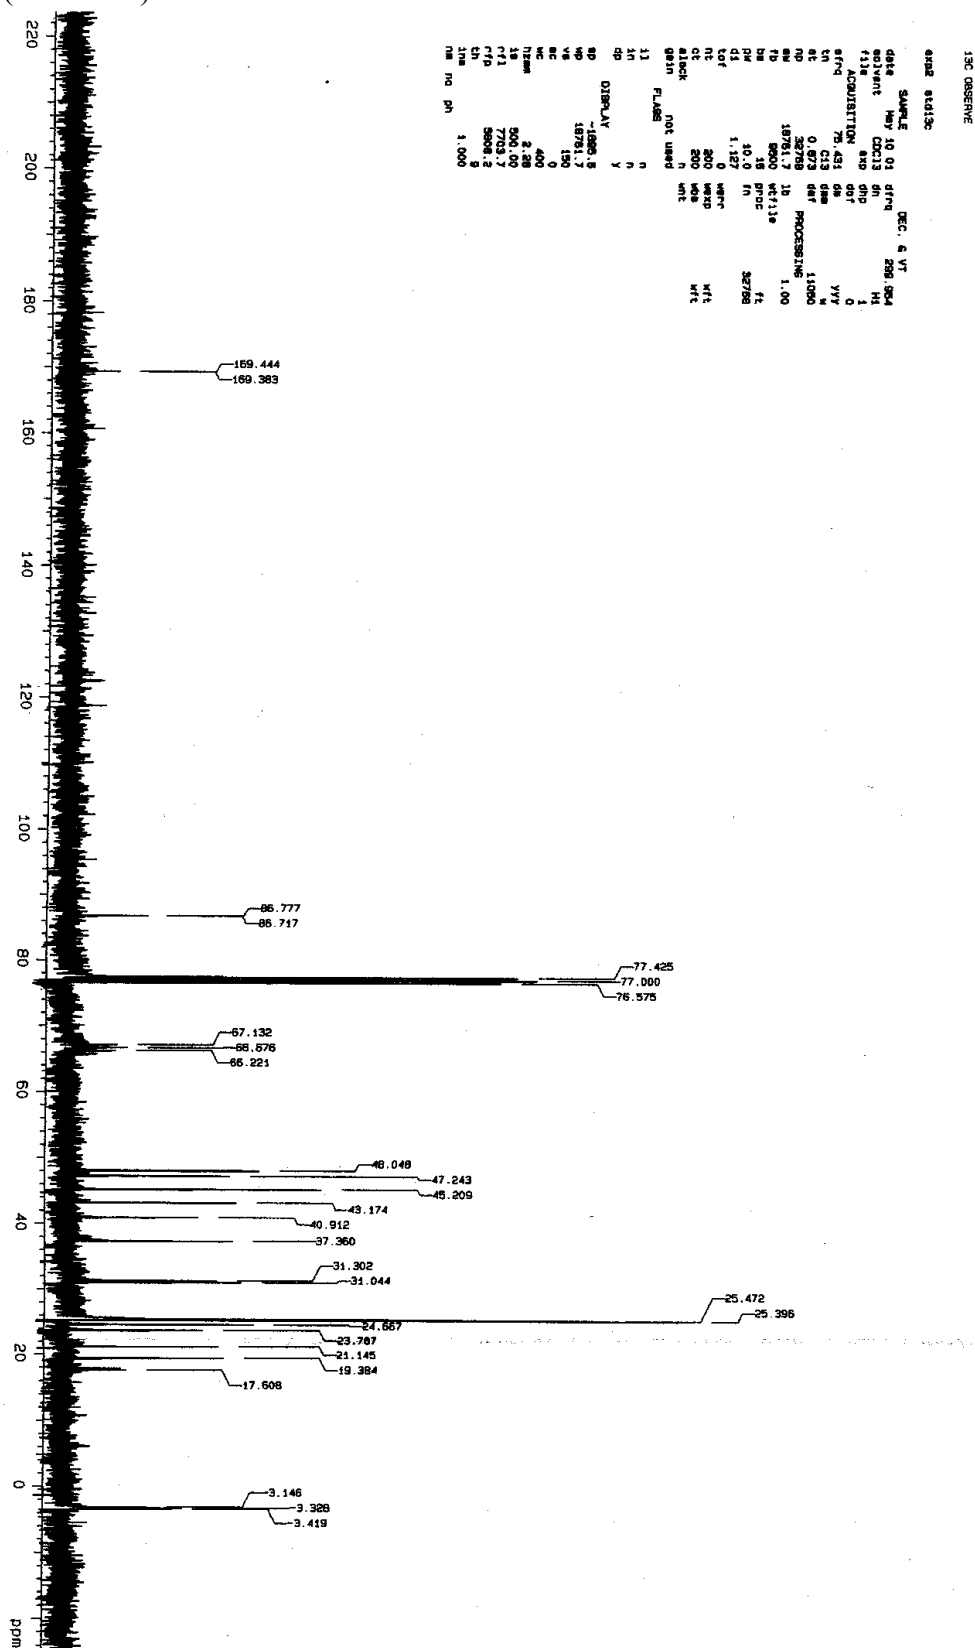

10c ( $^1\text{H-NMR}$ )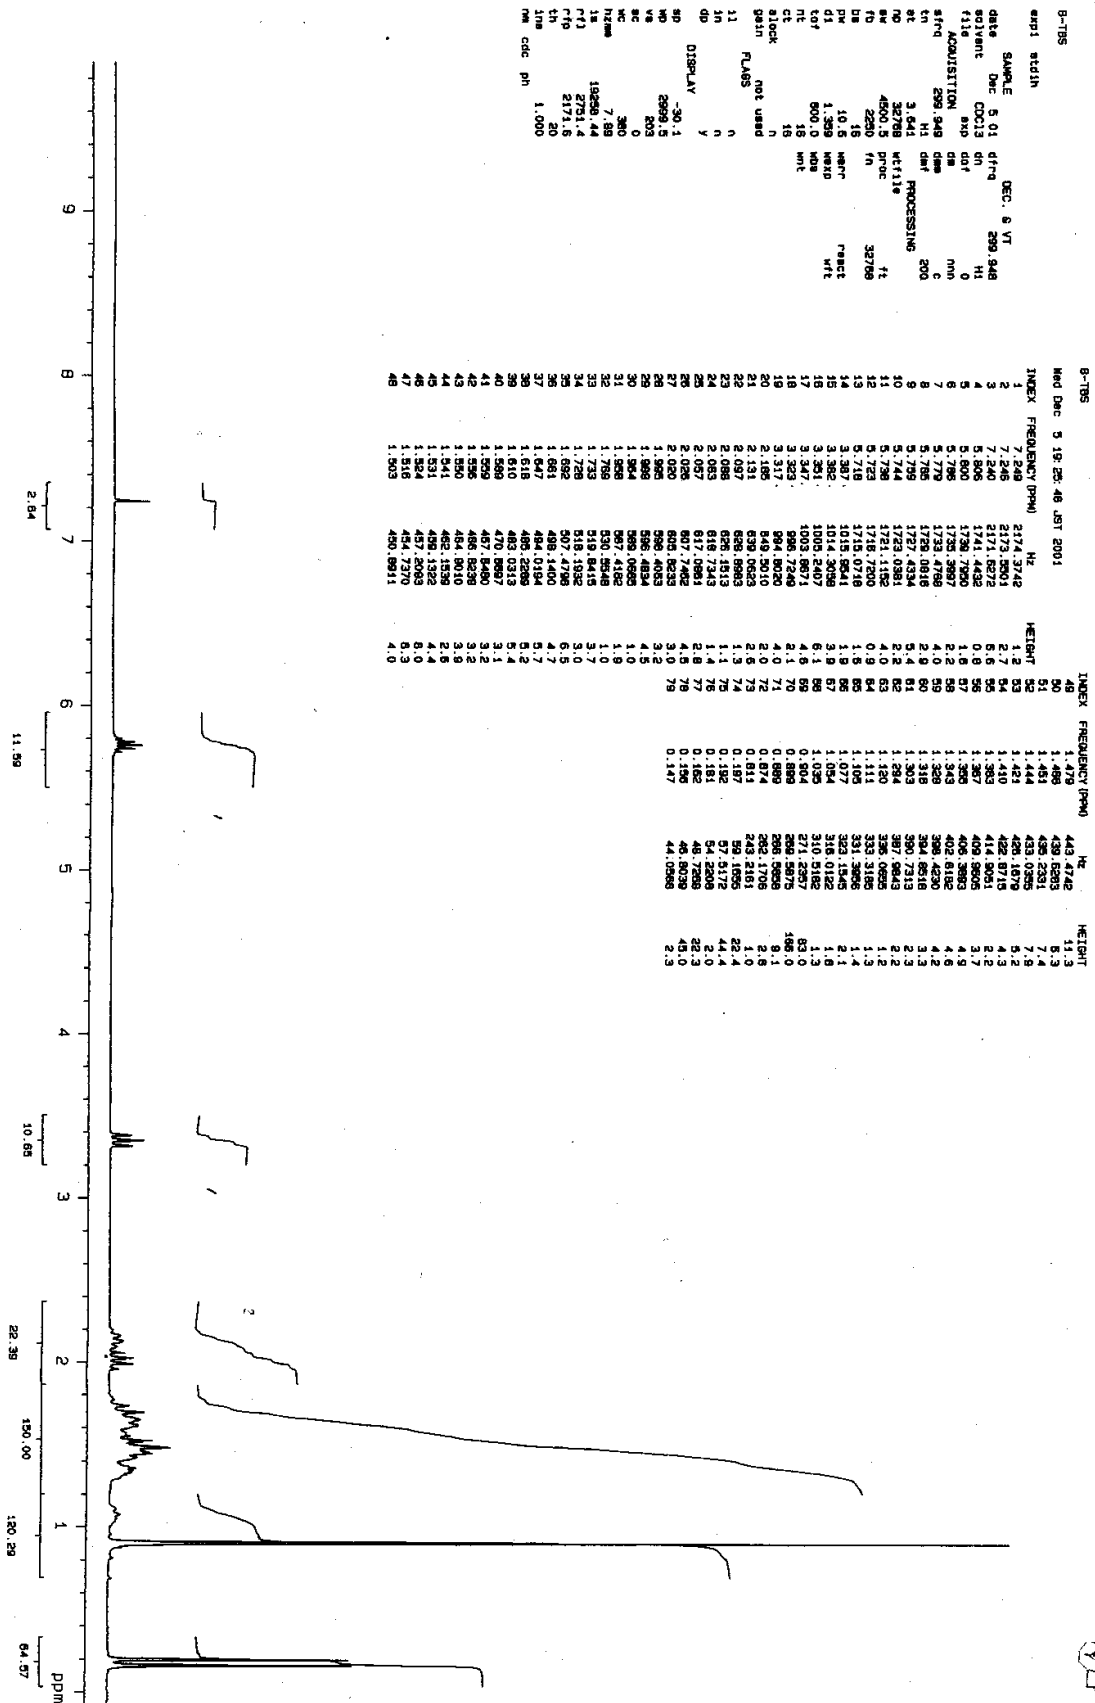

10c ( $^{13}\text{C}$ -NMR)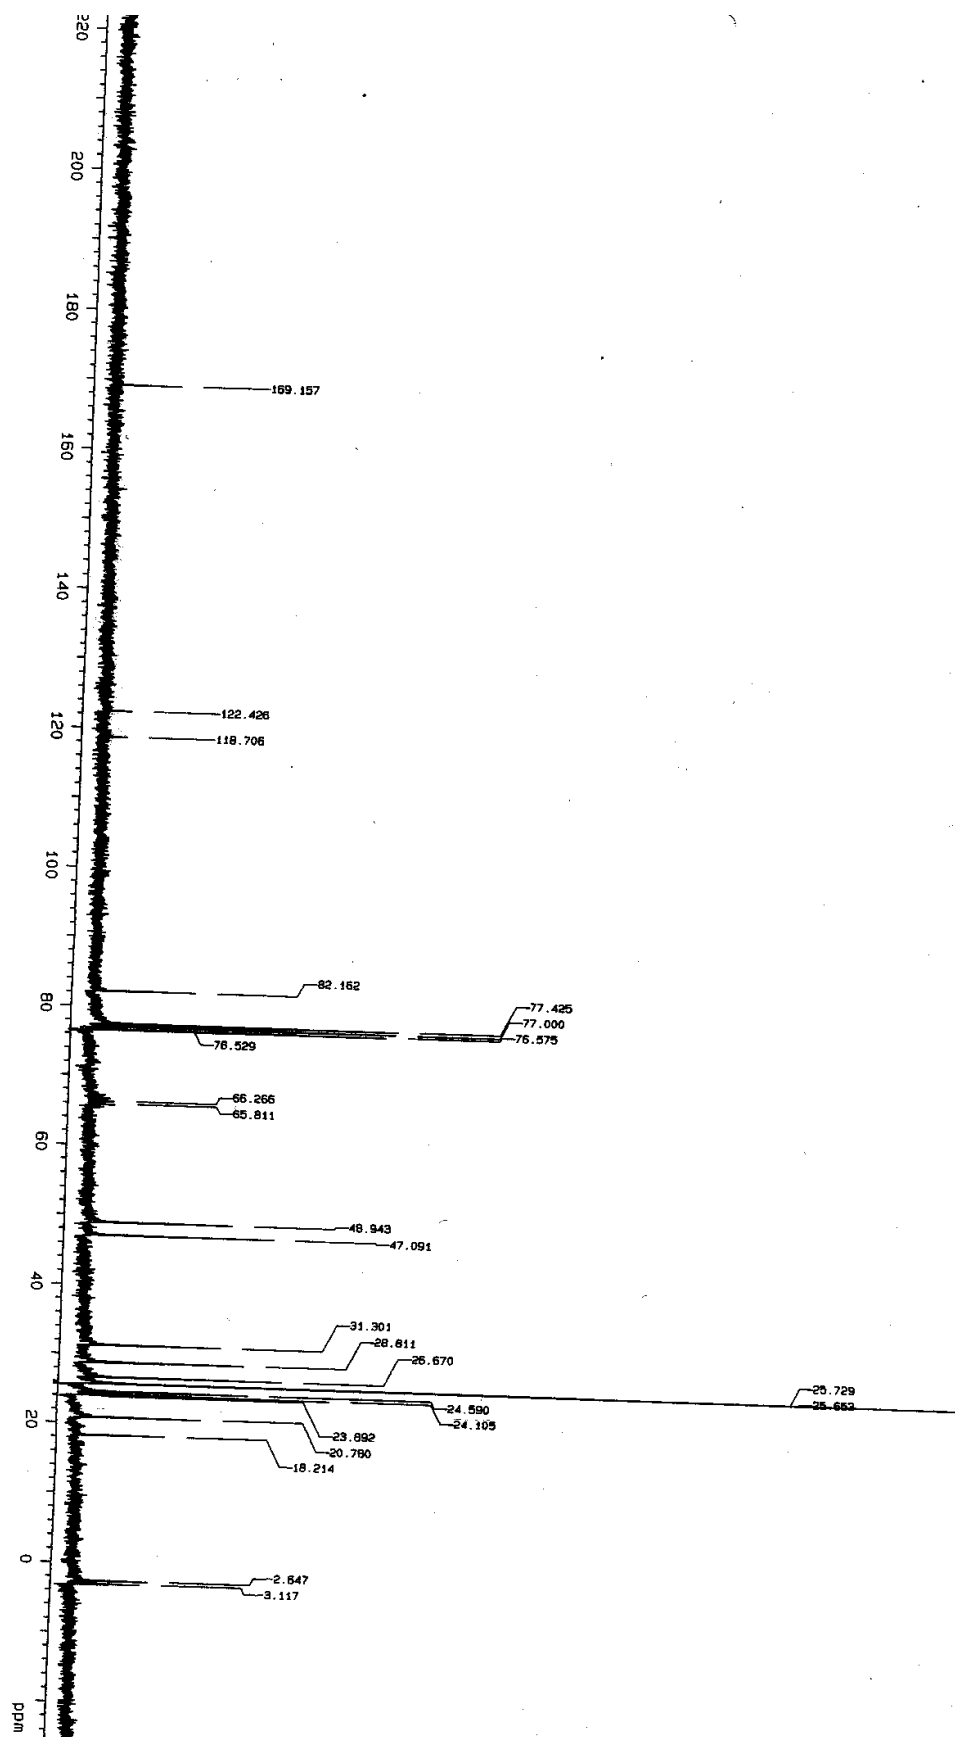

**10d'** (<sup>1</sup>H-NMR)



**10e** ( $^1\text{H}$ -NMR)

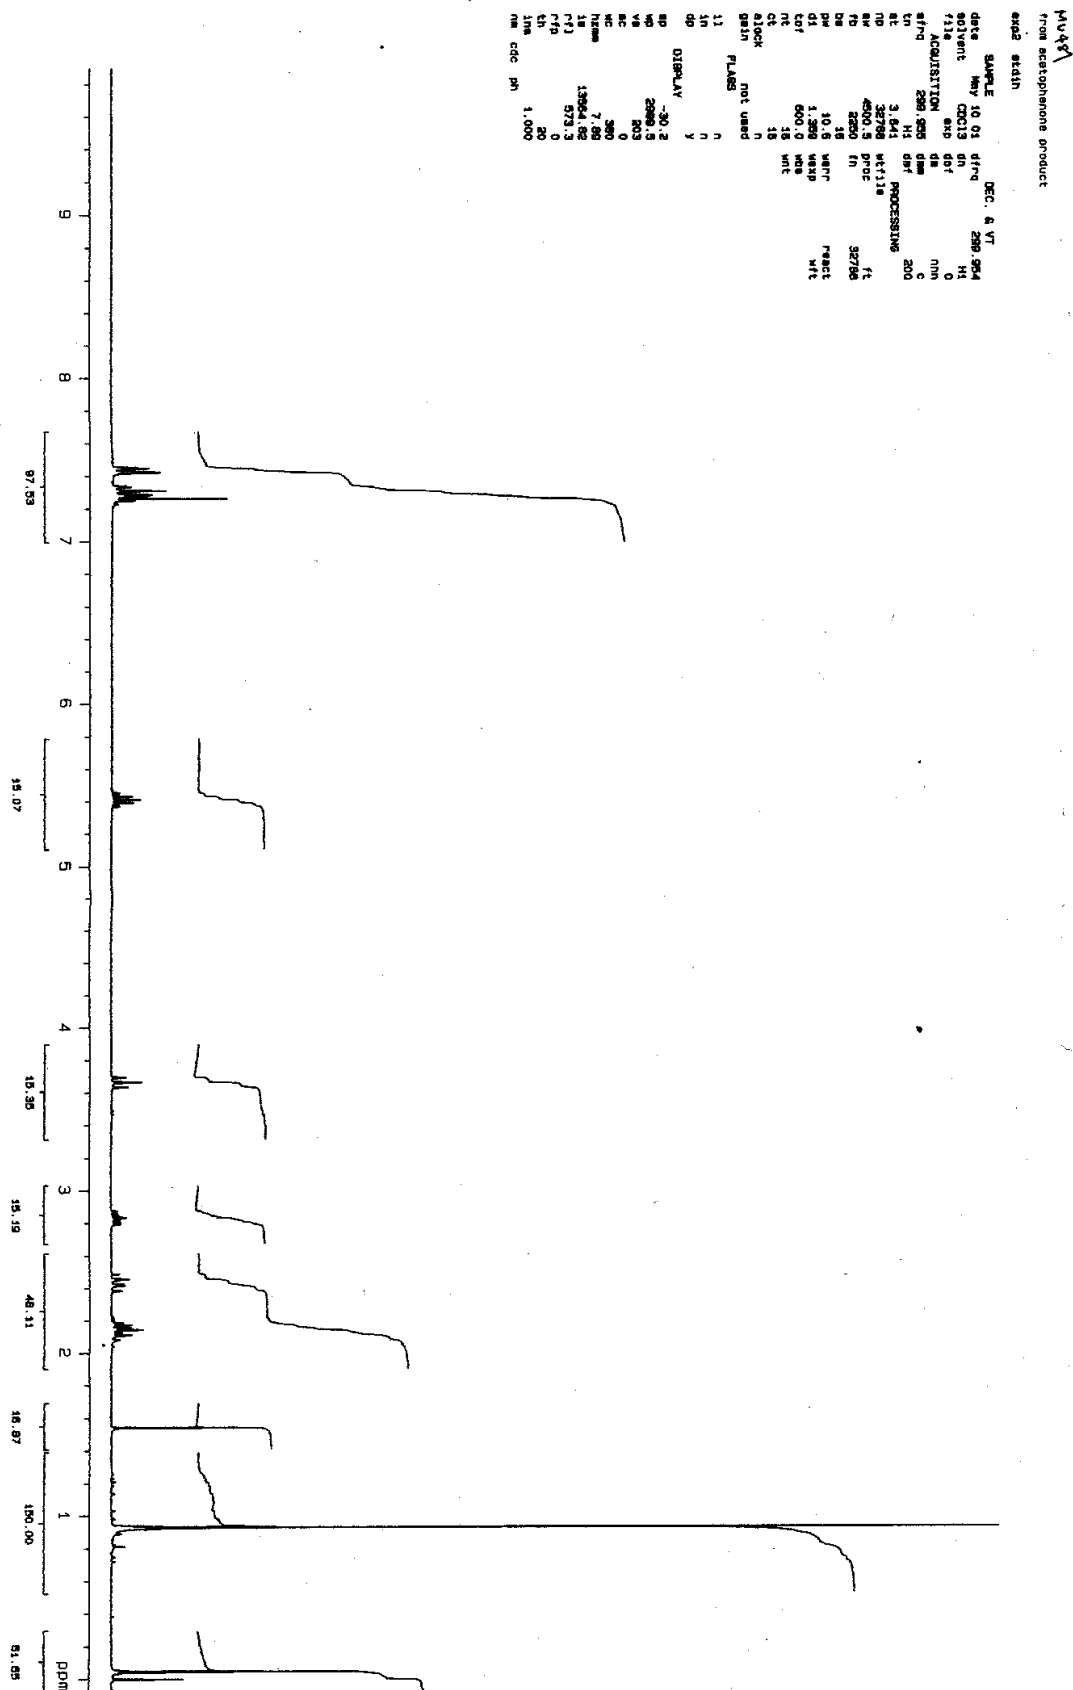

**10e** ( $^{13}\text{C}$ -NMR)

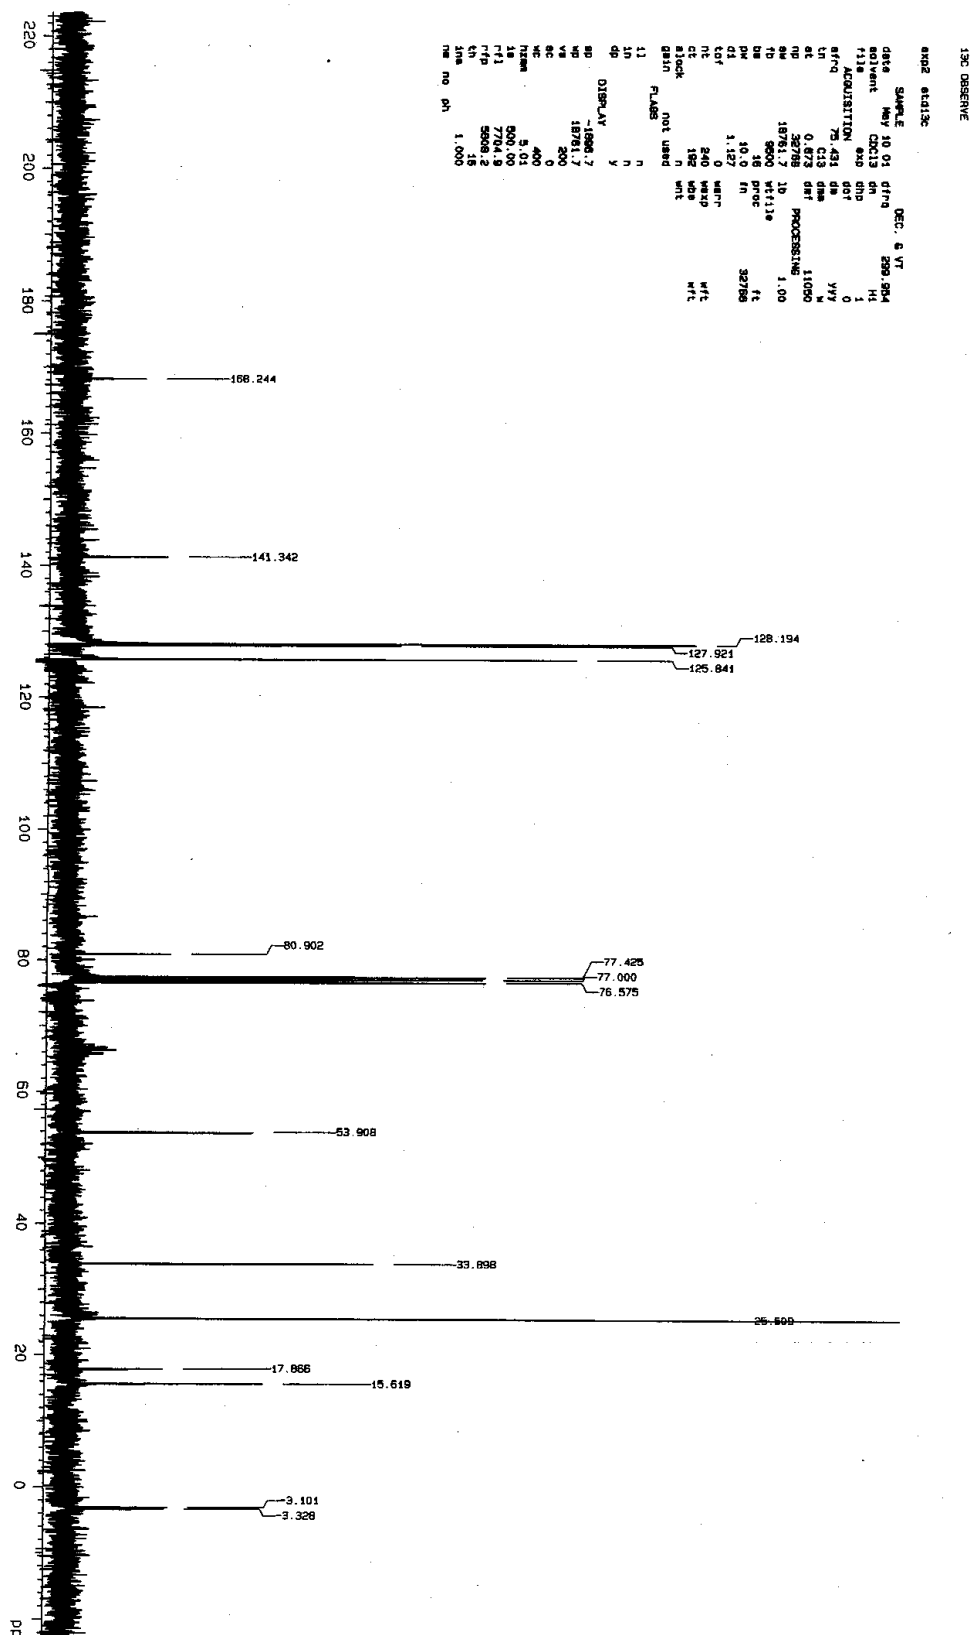



[illegible]

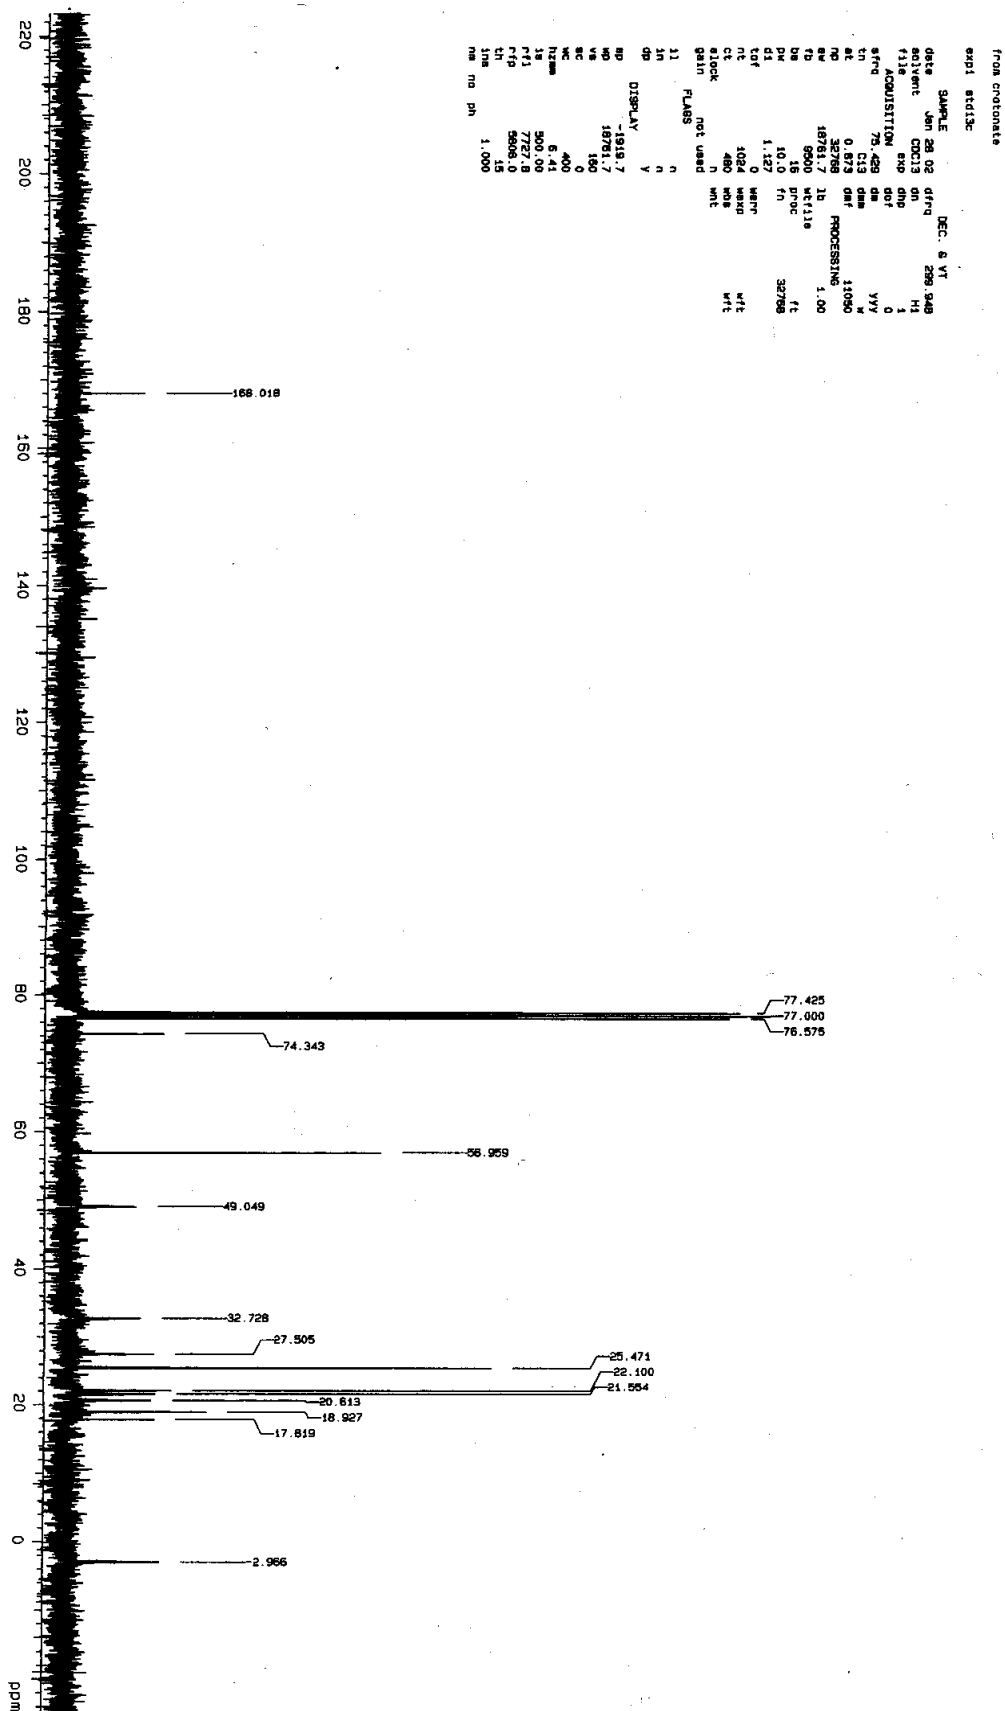

**10i** ( $^1\text{H}$ -NMR)

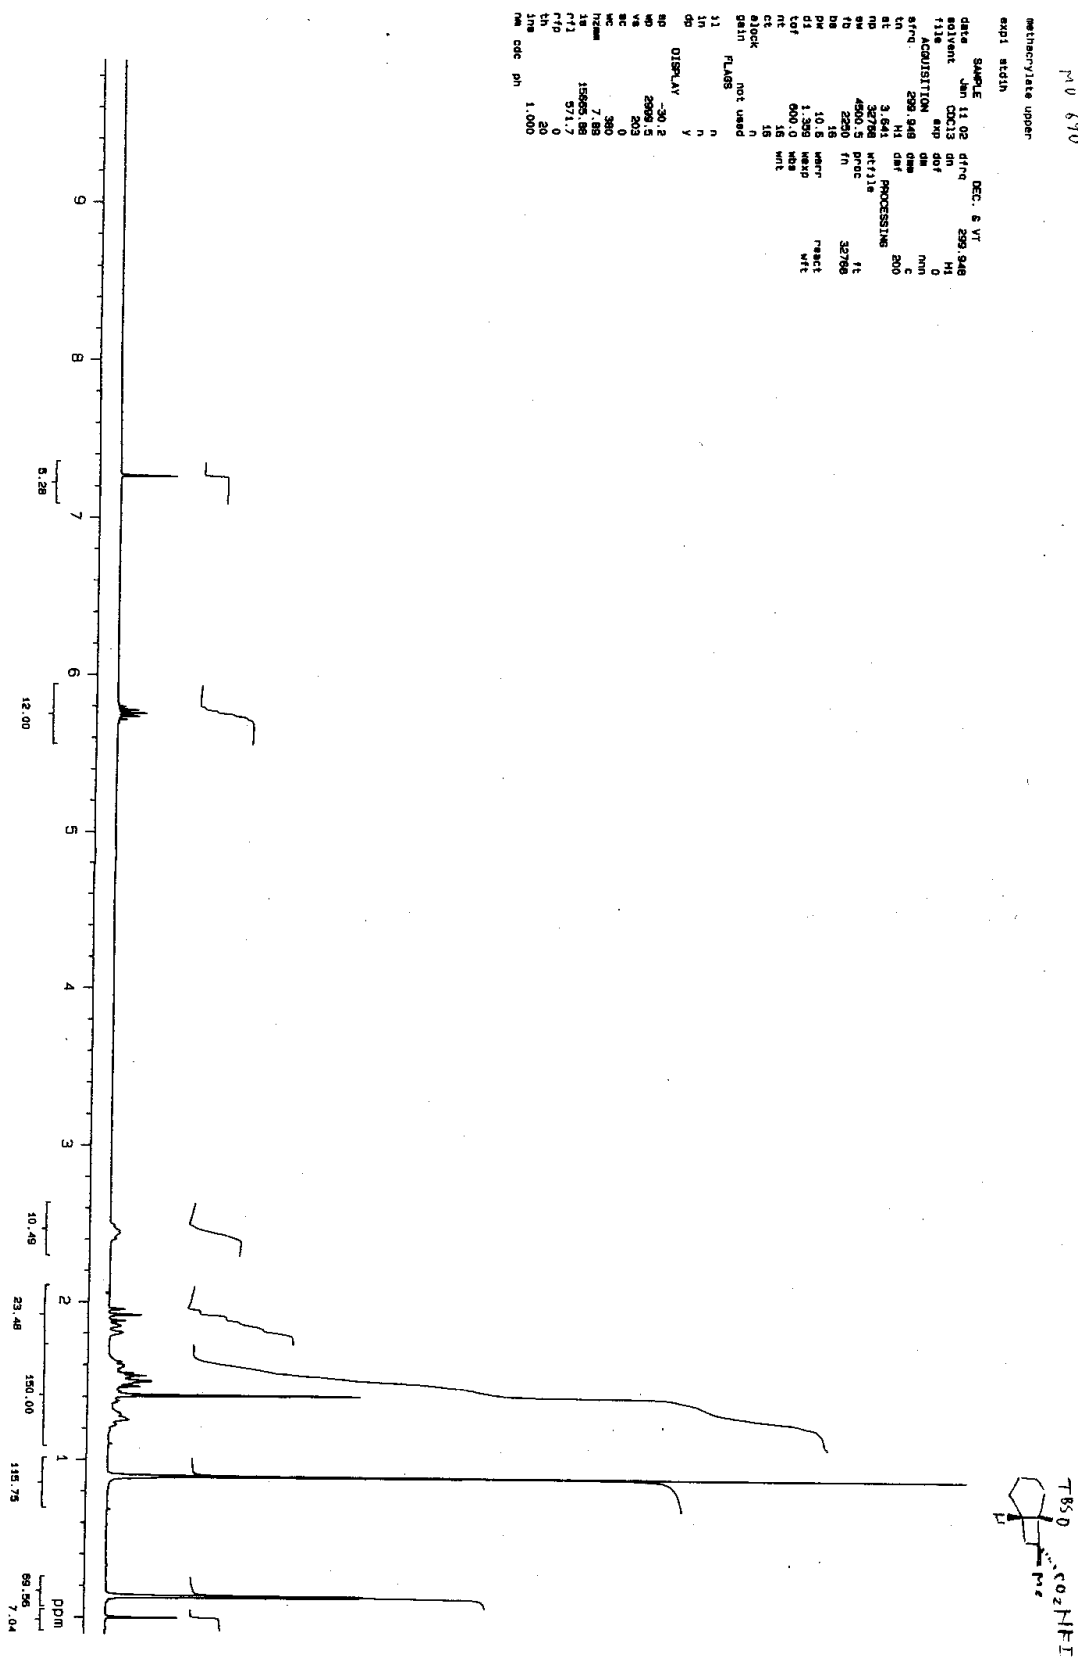

**10i** ( $^{13}\text{C}$ -NMR)

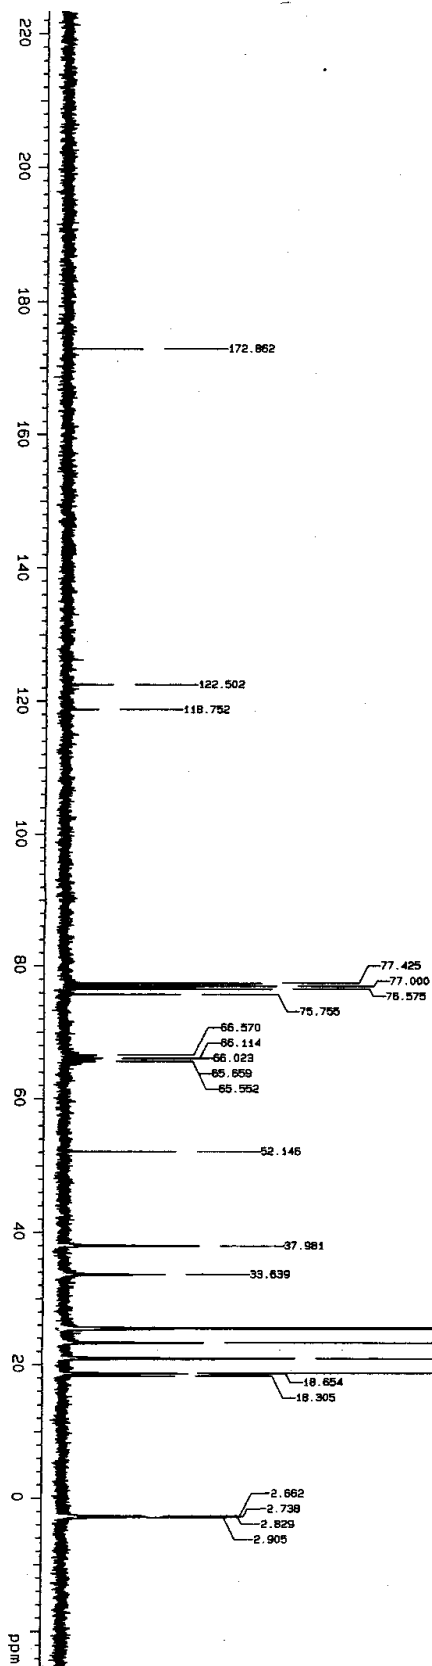

| exp1: etd13c |           | SAMPLE     |       | DEC. 5 Yr |  |
|--------------|-----------|------------|-------|-----------|--|
| date         | Jan 12 02 | dfreq      | 250   | 948       |  |
| solvent      | COOL3     | sn         | 1     |           |  |
| title        |           | exp        | 1     |           |  |
| dfreq        | 75        | exp        | 0     |           |  |
| acq          | 75        | exp        | 0     |           |  |
| at           | 0.873     | df         | 11050 |           |  |
| sv           | 32786     | PROCESSING | 1.00  |           |  |
| nv           | 18761.7   | 1b         |       |           |  |
| rn           | 5900      | wt11a      |       |           |  |
| rn           | 5900      | wt11a      |       |           |  |
| pm           | 10.6      | wt11a      |       |           |  |
| d1           | 1.127     | wt11a      |       |           |  |
| cof          | 0         | wt11a      |       |           |  |
| ct           | 1042      | wt11a      |       |           |  |
| cl           | 1042      | wt11a      |       |           |  |
| black        | 1         | wt11a      |       |           |  |
| sn           | not used  | wt11a      |       |           |  |
| flags        |           | wt11a      |       |           |  |
| sn           | n         | wt11a      |       |           |  |
| sn           | n         | wt11a      |       |           |  |
| sn           | y         | wt11a      |       |           |  |
| sn           | 1818.6    | wt11a      |       |           |  |
| sn           | 18761.7   | wt11a      |       |           |  |
| sn           | 170       | wt11a      |       |           |  |
| sn           | 400       | wt11a      |       |           |  |
| sn           | 501.00    | wt11a      |       |           |  |
| sn           | 7726.6    | wt11a      |       |           |  |
| sn           | 5900.0    | wt11a      |       |           |  |
| sn           | 6         | wt11a      |       |           |  |
| sn           | 1.000     | wt11a      |       |           |  |

(Z)-11 (<sup>1</sup>H-NMR)

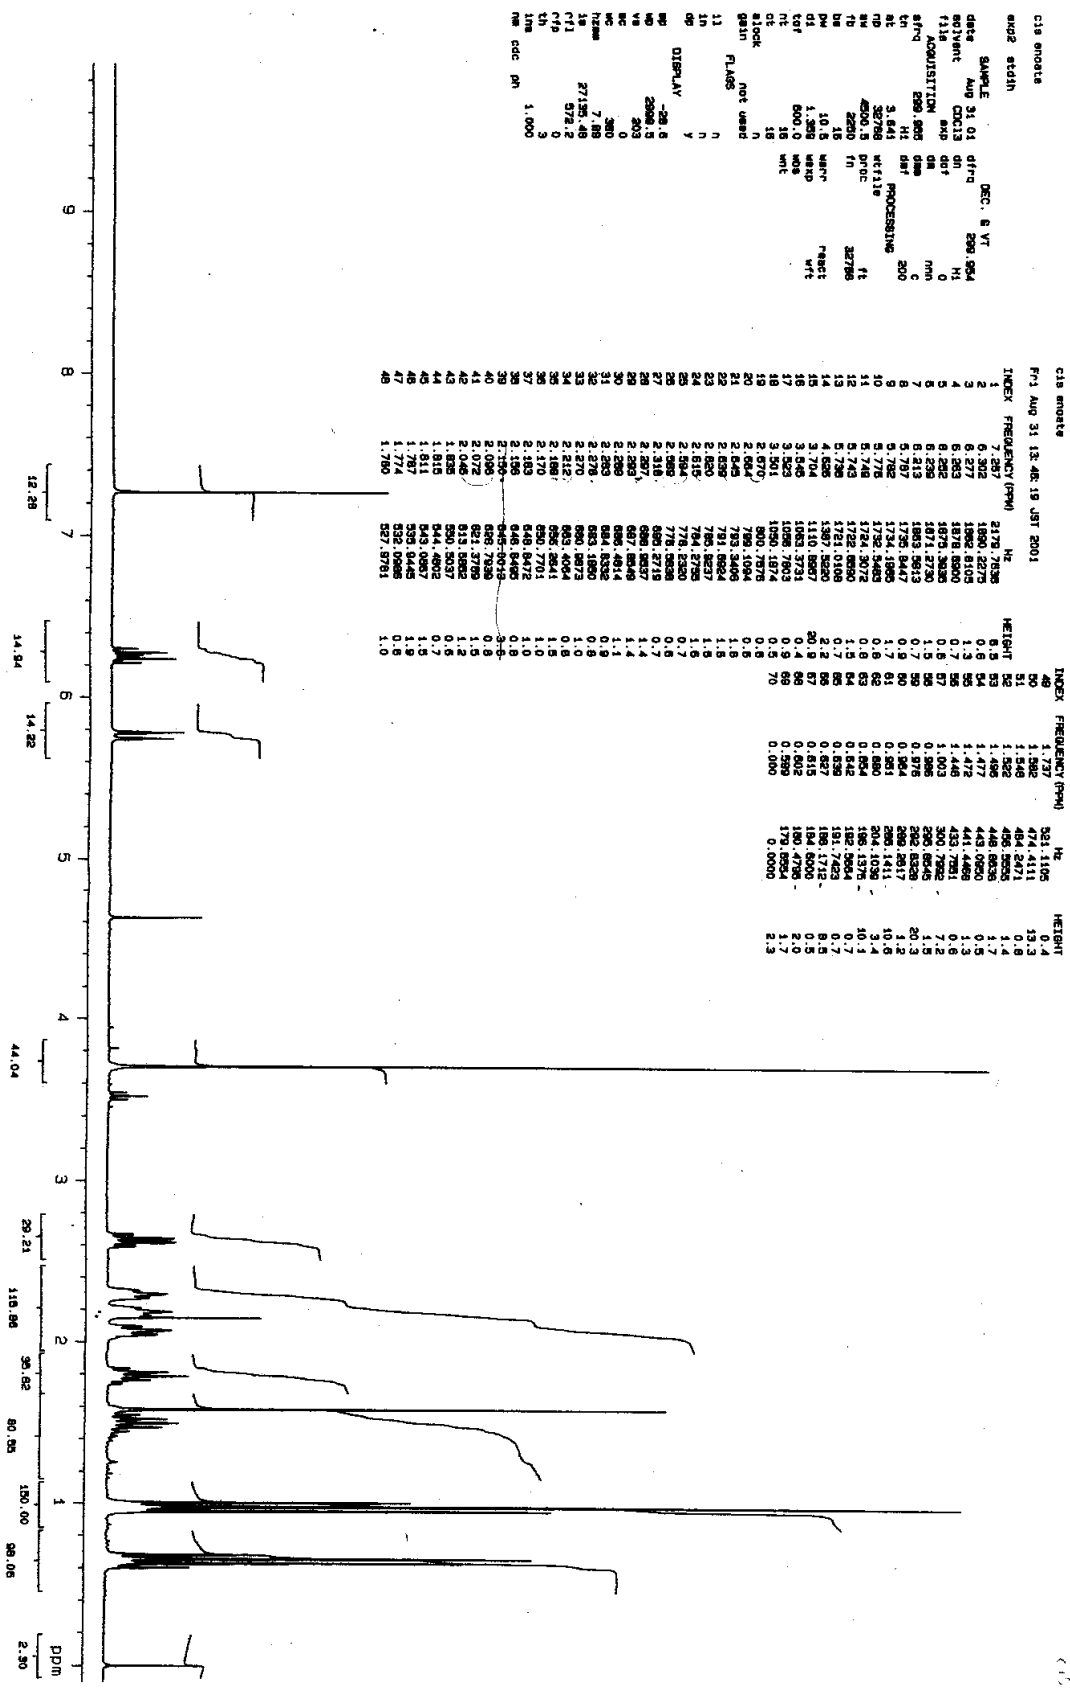

(Z)-11 (<sup>13</sup>C-NMR)

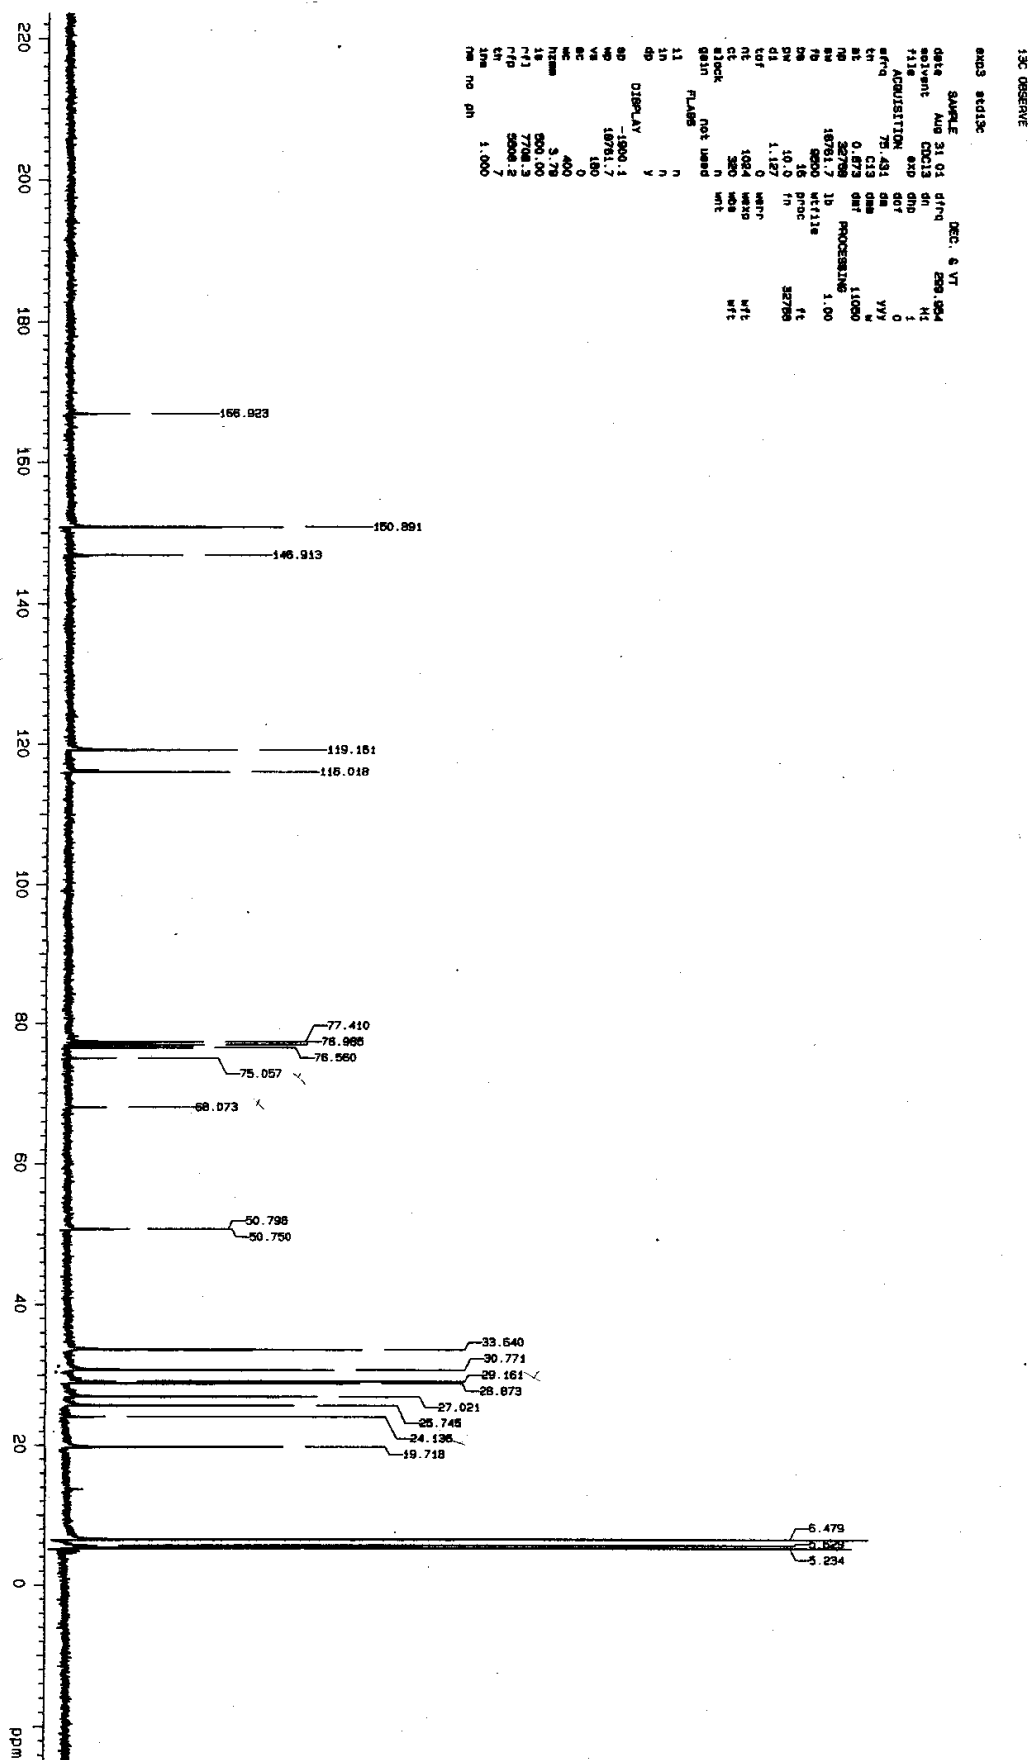

Supplement: Supplementary file 1 [file 5191573]
